# Supplementary material for: Variation in Clinical Application of Hyperthermic Intraperitoneal Chemotherapy: A Review
Source: PubMed Central journal article supplement (PMC6357036; doi:10.3390/cancers11010078), 2019-01-11
Supplement: cancers-11-00078-s001.pdf [file cancers-11-00078-s001.pdf]

## Supplementary Materials: Variation in Clinical Application of Hyperthermic Intraperitoneal Chemotherapy: A Review

Roxan F. C. P. A. Helderma, Daan R. Löke, H. Petra Kok, Arlene L. Oei, Pieter J. Tanis, Nicolaas A. P. Klaas Franken and Johannes Crezee

Table S1. CRC origin.

| Institute, Country                                                                      | Drug(s) and dosage (mg/m <sup>2</sup> )                 | Carrier solution                    | Drug schedule | Volume (L)         | Flow rate (mL/min) | Temp. (°C) | Duration (min) | Delivery method         | Median OS (months)       | 1-year (%) | 3-year (%) | 5-year (%) | Mortality (%) | No of HIPEC procedures | Reference |
|-----------------------------------------------------------------------------------------|---------------------------------------------------------|-------------------------------------|---------------|--------------------|--------------------|------------|----------------|-------------------------|--------------------------|------------|------------|------------|---------------|------------------------|-----------|
| The Netherlands Cancer Institute, The Netherlands                                       | MMC (35) or OXA (460)                                   | Dianeal                             | ½ / ¼ - ¼     | NR                 | NR                 | 42         | 30–90          | Open                    | 37.2 (MMC)<br>29.4 (OXA) | NR         | NR         | NR         | 3.8           | 173                    | [1]       |
| VU University Medical Center & Catharina Hospital Eindhoven, The Netherlands            | MMC (35) or OXA (460)                                   | NR                                  | NR            | NR                 | NR                 | 37–41      | 30–90          | Open or Semi-open       | 27                       | NR         | NR         | NR         | 1.1           | 345                    | [2]       |
| 15 Spanish HIPEC centers, Spain                                                         | MMC (30)                                                | 1.5% dextrose                       | NR            | 4                  | NR                 | 42–43      | 60             | Open, Closed, Semi-open | NR                       | NR         | NR         | NR         | NR            | NR                     | [3]       |
| Mulicenter, Japan                                                                       | CDDP (100) or MMC (10) and/or CDDP (50)                 | NR                                  | NR            | NR                 | NR                 | 42         | 60             | Open                    | NR                       | NR         | NR         | 75.5       | NR            | 42                     | [4]       |
| The Netherlands Cancer Institute and Radboud University Medical Centre, The Netherlands | Until March 2014 MMC (35)<br>After March 2014 OXA (460) | NR                                  | NR            | NR                 | NR                 | 42–43      | 30–90          | Open                    | 51.7                     | NR         | NR         | NR         | NR            | 414                    | [5]       |
| Erasmus Medical Centre, Rotterdam, the Netherlands                                      | OXA (260)                                               | Dianeal                             | NR            | 2 L/m <sup>2</sup> | 1000               | 42         | 30             | Open or Closed          | NR                       | NR         | NR         | NR         | NR            | NR                     | [6]       |
| Severance Hospital & Gangnam Severance Hospital, Korea                                  | MMC (35)                                                | Dianeal: 1.5% dextrose              | ½ - ¼ - ¼     | 3                  | 800–1000           | 42–43      | 90             | Open                    | NR                       | NR         | NR         | NR         | NR            | 66                     | [7]       |
| National Cancer Centre Singapore, Singapore                                             | MMC (10)                                                | NR                                  | NR            | NR                 | NR                 | 41–42      | 60             | Closed                  | 36                       | NR         | NR         | 40.5       | 0             | 60                     | [8]       |
| Manipal Comprehensive Cancer Center, India                                              | 5-FU (400) or OXA (300)                                 | Saline and electrolyte free glucose | NR            | NR                 | NR                 | 42         | 30–90          | Semi-open or Closed     | 76.9                     | NR         | NR         | NR         | 1.8           | 56                     | [9]       |
| Saint-Luc University Hospital, Belgium                                                  | OXA (460) or MMC (35)                                   | NR                                  | NR            | NR                 | NR                 | 41–42      | 30–90          | Closed                  | NR                       | 89.5       | NR         | NR         | 0             | 52                     | [10]      |
| Multicenter, The Netherlands                                                            | Before June 2014 MMC (35)<br>After June 2014 OXA(460)   | NR                                  | NR            | NR                 | NR                 | 41         | 30–90          | Open                    | NR                       | NR         | NR         | NR         | 0             | 43                     | [11]      |

|                                                                       |                                             |                         |                               |                    |           |                |             |                           |      |      |      |      |     |     |      |
|-----------------------------------------------------------------------|---------------------------------------------|-------------------------|-------------------------------|--------------------|-----------|----------------|-------------|---------------------------|------|------|------|------|-----|-----|------|
| University of California, San Diego, USA                              | MMC (10)                                    | NR                      | NR                            | 3-6                | NR        | 42             | 90          | Closed                    | NR   | NR   | NR   | NR   | NR  | 51  | [12] |
| Lariboisière Hospital Paris, France                                   | OXA (460)<br>Recurrence: MMC                | NR                      | NR                            | 2 L/m <sup>2</sup> | NR        | 42–43          | NR          | Closed                    | NR   | NR   | NR   | NR   | NR  | 341 | [13] |
| St George Hospital in Sydney, Australia                               | OXA (350)                                   | 5% dextrose             | NR                            | 0.5                | NR        | 42             | 30          | Open                      | NR   | NR   | NR   | 26.8 | 2.3 | 184 | [14] |
| National Cancer Centre Singapore, Singapore                           | MMC (35)                                    | NR                      | NR                            | 2-3                | NR        | 42             | 60          | Closed                    | 27.1 | 83.7 | 38.7 | 19.1 | NR  | 35  | [15] |
| 9 Dutch HIPEC centers, The Netherlands                                | OXA (460)                                   | Isotonic dialysis fluid | NR                            | 2                  | 500       | 42–43          | 30          | Open or Laparoscopic      | NR   | NR   | NR   | NR   | NR  | 176 | [16] |
| University of California, San Diego, USA                              | MMC (10 mg/L)                               | NR                      | $\frac{2}{3}$ - $\frac{1}{3}$ | 3–6                | NR        | 42             | 90          | Closed                    | NR   | NR   | NR   | NR   | 1.4 | 70  | [17] |
| Shiga University of Medical Science in Shiga, Japan                   | MMC (10 mg) + 5-FU (1000 mg)                | Saline                  | NR                            | 5                  | 500-750   | 42–43          | 30          | Open                      | NR   | 100  | 100  | NR   | 0   | 5   | [18] |
| Shiga University of Medical Science, Japan                            | MMC + 5-FU (90-130)                         | Saline                  | NR                            | 5                  | 500-750   | 42–43          | 30          | Open                      | NR   | 66   | NR   | NR   | 0   | 9   | [19] |
| Ghent University Hospital, Belgium                                    | OXA (200-460) or MMC (35)                   | NR                      | NR                            | NR                 | NR        | 41             | 30-90       | Open                      | 27   | NR   | NR   | NR   | 2.4 | 166 | [20] |
| Milan National Cancer Institute & Bentivoglio General Hospital, Italy | CDDP (25ml/m <sup>2</sup> /L <sup>2</sup> ) | NR                      | NR                            | 4–6                | 700       | 42.5           | 60          | Closed                    | NR   | NR   | NR   | 58.8 | 3   | 101 | [21] |
| Wake Forest University Baptist Medical Center, USA                    | MMC (40 mg)                                 | Crystalloid             | $\frac{3}{4}$ - $\frac{1}{4}$ | 3                  | 800-1000  | 40–42.5        | 120         | Closed                    | 43   | NR   | NR   | NR   | 0   | 27  | [22] |
| Zhongnan Hospital of Wuhan University, China                          | CDDP (20 µg/mL) + MMC (5 µg/mL)             | Saline                  | NR                            | 6                  | 500       | 42.5–43.5      | 90          | Open                      | 16   | 70.5 | 22   | 22   | 0   | 60  | [23] |
| Bentivoglio Hospital, Italy                                           | CDDP (25) + MMC (3.3)                       | NR                      | NR                            | 4–6                | 800-1200  | 42.5           | 60          | Closed                    | NR   | NR   | NR   | 83.3 | 0   | 12  | [24] |
| National Cancer Centre Singapore, Singapore                           | MMC                                         | NR                      | NR                            | 2-2.5              | NR        | 42             | 60          | Closed                    | NR   | NR   | NR   | 50.9 | 0   | 28  | [25] |
| Aarhus University Hospital, Denmark                                   | MMC (35)                                    | Dialysis                | NR                            | NR                 | NR        | 41–42.5        | 90          | Open                      | NR   | NR   | 47   | 38   | 1.3 | 34  | [26] |
| The Valley Hospital Paramus, USA                                      | MMC (30)                                    | Dextrose                | NR                            | NR                 | 1500-2000 | 42             | 90          | Closed                    | NR   | NR   | NR   | NR   | 0   | 5   | [27] |
| 6 Belgian surgical centers, Belgium                                   | OXA (460)                                   | 5% Glucose              | NR                            | 2 L/m <sup>2</sup> | NR        | 41–42          | 30          | Open                      | NR   | 97.5 | NR   | NR   | 0   | 48  | [28] |
| Centre Hospitalo-Universitaire Lyon Sud, France                       | MMC (0.7 mg/kg) + IR                        | NR                      | NR                            | 3–4                | 500       | 44–46 (Inflow) | 90          | Closed                    | NR   | NR   | NR   | NR   | 0   | 12  | [29] |
| 5 Italian hospital and university centers, Italy                      | Between 1995-2005 CDDP (25) and/or          | 5% Dextrose             | NR                            | 2 L/m <sup>2</sup> | NR        | 41.5–42–44     | 60-90<br>30 | Open, Closed or Semi-open | 21   | NR   | NR   | NR   | 2.7 | 146 | [30] |

|                                                                                       | MMC (3.3)<br>Between 2005-2007<br>OXA (460) |                  |           |                    |           |           |       |              |      |      |      |      |     |     |      |  |
|---------------------------------------------------------------------------------------|---------------------------------------------|------------------|-----------|--------------------|-----------|-----------|-------|--------------|------|------|------|------|-----|-----|------|--|
| St Agnes Hospital, USA & St George Hospital, Sydney, Australia                        | MMC (10-20)                                 | NR               | NR        | NR                 | NR        | 42        | 90    | Open         | NR   | 85   | 48   | NR   | 0   | 56  | [31] |  |
| Cancer Center of Wuhan University, China                                              | MMC (30)                                    | Saline           | NR        | 12                 | 200       | 42.5–43.5 | 60-90 | Open         | NR   | 66.7 | NR   | 30   | 0   | 21  | [32] |  |
| University of Calgary, Canada                                                         | MMC (12-15 mg)                              | NR               | NR        | NR                 | NR        | 40–42     | 60    | Open         | NR   | NR   | 36   | NR   | 13  | 31  | [33] |  |
| Poissy Medical Center, France                                                         | MMC (80 + CDDP (200))                       | 0.9% NaCl        | NR        | 3                  | NR        | 42–44     | 35-45 | Laparoscopic | NR   | 86   | NR   | NR   | 0   | 21  | [34] |  |
| Azienda Ospedaliera di Rilievo Nazionale ed di Alta Specializzazione Garibaldi, Italy | MMC (3.3) + CDDP (25)                       | NR               | NR        | 4–5                | 600–1200  | 42.5      | 60    | Closed       | NR   | NR   | NR   | NR   | 0   | 23  | [35] |  |
| St Agnes Hospital, USA & St George Hospital, Australia                                | MMC (10-20)                                 | 1.5% Dextrose    | NR        | 2–3                | NR        | 42        | 90    | Closed       | 13   | NR   | NR   | NR   | 0   | 15  | [36] |  |
| The Netherlands Cancer Institute, The Netherlands                                     | MMC (35)                                    | Isotonic         | ½ - ¼ - ¼ | 3                  | 1000–2000 | 41-42     | 90    | Open         | NS   | NS   | NS   | 45   | 0   | 54  | [37] |  |
| Uppsala University Hospital, Sweden                                                   | OXA (460)                                   | 50 mg/mL Glucose | NR        | NR                 | NR        | 42-44     | 30    | Open         | NS   | 72.3 | NR   | NR   | <1  | 38  | [38] |  |
| Wake Forest University School of Medicine, USA                                        | OXA (200-250)                               | NR               | NR        | NR                 | 800–1000  | 40        | 120   | Closed       | NR   | NR   | NR   | NR   | NR  | 15  | [39] |  |
| New Jersey Medical School, USA                                                        | DOX (15-100)                                | 1.5% Dextrose    | NR        | 4                  | 1500–2000 | 40        | 90    | Open         | 30.6 | NR   | NR   | NR   | 0   | 9   | [40] |  |
| University of Pittsburgh Medical Center, USA                                          | MMC (40 mg)                                 | Saline           | 2/3 – 1/3 | 3                  | NR        | 42        | 100   | Closed       | 26.2 | NR   | 49.9 | NR   | 1.6 | 122 | [41] |  |
| Institut Gustave Roussy, France                                                       | OXA                                         | 5% Dextrose      | NR        | 2 L/m <sup>2</sup> | 1000      | 42-44     | 30    | Open         | 60.1 | NR   | NR   | NR   | NR  | NR  | [42] |  |
| Department of Surgery of the University Regensburg, Germany                           | MMC (20) + DOX (15)                         | NR               | NR        | 3                  | 1000–1800 | 41-42     | NR    | Closed       | NR   | 96   | NR   | NR   | 0   | 32  | [43] |  |
| Giovanni Battista Antica Sede Hospital, Italy                                         | MMC (15)                                    | NR               | NR        | 4-5                | 500–3000  | 42        | 60    | Closed       | 30.3 | 64   | NR   | NR   | 4   | 25  | [44] |  |
| St. George Hospital, Australia                                                        | MMC (10-12.5)                               | 1.5% Dextrose    | NR        | 2                  | NR        | 42        | 90    | Open         | 29   | 72   | NR   | NR   | 0   | 30  | [45] |  |
| Institut Gustave Roussy, France                                                       | OXA (460)                                   | 5% Dextrose      | NR        | NR                 | 2000      | 43        | 30    | Closed       | 60.1 | NR   | 53   | 48.5 | 0   | 30  | [46] |  |
| Institut Gustave Roussy, France                                                       | OXA (460)                                   | 5% Dextrose      | NR        | 2 L/m <sup>2</sup> | 2000      | 42-44     | 30    | Open         | NS   | 74   | NS   | NS   | 0   | 24  | [47] |  |
| Washington Hospital Center, USA                                                       | MMC (10-12.5) + 5-FU (650)                  | 5% Dextrose      | NR        | 2                  | NR        | 41-42     | 60    | Closed       | 35   | NR   | NR   | NR   | 0   | 34  | [48] |  |
| The Netherlands Cancer Institute, The Netherlands                                     | MMC (35)                                    | NR               | ½ - ¼ - ¼ | NR                 | NR        | 40-41     | 90    | Open         | 21.8 | 75   | 28   | 19   | 6   | 117 | [49] |  |
| Clinical Center of Serbia, Serbia                                                     | MMC (10-12.5)                               | Ringer's lactate | NR        | 2                  | NR        | 42        | 120   | Open         | 15   | NR   | NR   | NR   | 0   | 18  | [50] |  |
| The Netherlands Cancer Institute, The Netherlands                                     | MMC (35)                                    | NR               | ½ - ¼ - ¼ | 3                  | 1000–2000 | 41-42     | 90    | Open         | 41.6 | NR   | NR   | NR   | 2.9 | 102 | [51] |  |

|                                                                   |                                   |          |                    |                    |           |                               |     |                |      |             |      |    |     |     |      |
|-------------------------------------------------------------------|-----------------------------------|----------|--------------------|--------------------|-----------|-------------------------------|-----|----------------|------|-------------|------|----|-----|-----|------|
| Institut Gustave Roussy, France                                   | OXA (460)                         | NR       | NR                 | 2 L/m <sup>2</sup> | 2000      | 43                            | 30  | Open           | NS   | 83          | 74   | 65 | 8   | 24  | [52] |
| The Netherlands Cancer Institute,<br>The Netherlands              | MMC (35)                          | NR       | ½ - ¼ - ¼          | 3                  | 1000–2000 | 41-42                         | 90  | Open           | 22.3 | NR          | NR   | NR | 8   | 105 | [53] |
| University of Padova, Italy                                       | MMC (3.3) + CDDP<br>(25)          | NR       | NR                 | 4-6                | 700–1000  | 41.5-42                       | 90  | Open or Closed | 18   | 31          | NR   | NR | 0   | 46  | [54] |
| Centre Hospitalo-Universitaire<br>Lyon Sud, France                | MMC (0.7 mg/kg)                   | NR       | NR                 | 4-6                | 500       | Inflow 46-48<br>Outflow 41-43 | 90  | Closed         | NR   | 79 (2-year) | NR   | NR | 1.8 | 26  | [55] |
| China Medical University, China                                   | 5-FU (0.5 gr/L) +<br>MMC (8 mg/L) | NR       | ¼ / 15 min         | 4                  | NR        | 43-45                         | 60  | Open           | NR   | NR          | 65.8 | NR | 0   | 46  | [56] |
| Institut Gustave Roussy<br>Comprehensive Cancer Center,<br>France | OXA (260-460)                     | NR       | NR                 | NR                 | 2000      | 42-44                         | 30  | Open           | NR   | NR          | NR   | NR | 0   | 22  | [57] |
| The Netherlands Cancer Institute,<br>The Netherlands              | MMC (15-40)                       | Isotonic | NR                 | NR                 | 1000      | 40-41                         | 90  | Open           | NR   | NR          | 23   | NR | 3   | 29  | [58] |
| Université C.B. Lyon-I, France                                    | MMC (10 mg/L)                     | NR       | NR                 | 4-6                | 400–500   | Inflow 46-49<br>Outflow 41-43 | 90  | Closed         | 12   | NR          | NR   | NR | 3.6 | 27  | [59] |
| University General Hospital,<br>Greece                            | CDDP (80-120)                     | NR       | 3 L/m <sup>2</sup> | 4-9                | NR        | 41-43                         | 120 | Closed         | NR   | NR          | NR   | NR | 4   | 21  | [60] |
| Centre Hospitalo-Universitaire<br>Lyon Sud, France                | MMC (0.7 mg/kg)                   | NR       | NR                 | 4-6                | 500       | Inflow 46-48<br>Outflow 41-43 | 90  | Closed         | NR   | NR          | NR   | NR | 5.6 | 13  | [61] |

CDDP: Cisplatin, MMC: Mitomycin C, DOX: Doxorubicin, OXA: Oxaliplatin, 5: 5-fluoro-uracil, IR: Irinotecan, NR: Not Reported.

Table S2. Ovarian origin.

| Institute, Country                                                          | Drug(s) and dosage (mg/m <sup>2</sup> )                         | Carrier solution    | Drug schedule | Volume (L) | Flow rate (mL/min) | Temp. (°C) | Duration (min) | Delivery method | Median OS (months) | 1-year (%) | 3-year (%) | 5-year (%) | Mortality (%) | No of HIPEC procedures | Reference |
|-----------------------------------------------------------------------------|-----------------------------------------------------------------|---------------------|---------------|------------|--------------------|------------|----------------|-----------------|--------------------|------------|------------|------------|---------------|------------------------|-----------|
| Danylo Halytsky Lviv National Medical University, Ukraine                   | CDDP (100) or CDDP (75) + DOX (15)                              | NR                  | NR            | NR         | NR                 | 41.9–44.7  | 90             | Closed          | 30.2               | NR         | NR         | NR         | 6.8           | 59                     | [62]      |
| Netherlands Cancer Institute, the Netherlands                               | CDDP (100)                                                      | NR                  | ½ - ¼ / ¼     | NR         | 1000               | 40         | 90             | Open            | 45.7               | NR         | 62         | NR         | 0.8           | 122                    | [63]      |
| Clinical Center of Serbia, Serbia                                           | CDDP (15-30) + DOX (0.1-10)                                     | Ringer's lactate    | NR            | 2          | NR                 | 42         | 120            | Closed          | 40.3               | NR         | 65         | 24         | 0.8           | 60                     | [64]      |
| Instituto de Medicina Integral Professor Fernando Figueira, Brazil          | CDDP (25-240)                                                   | NR                  | NR            | 4-6        | 700                | 41–43      | 30             | Closed          | NR                 | NR         | NR         | NR         | 0             | 9                      | [65]      |
| Zhongnan Hospital of Wuhan University, China                                | CDDP (100) + MMC (20) + PAC (100)                               | Saline              | NR            | 6          | NR                 | 42.5–43.5  | 60             | Open            | 57.5               | 97.8       | 65.2       | 56.5       | 0             | 46                     | [66]      |
| University General Hospital, Spain                                          | PAC (175)                                                       | NR                  | NR            | NR         | NR                 | 42         | 60             | Closed          | NR                 | NR         | NR         | NR         | 4.76          | 21                     | [67]      |
| Catholic University of the Sacred Heart of Rome & S. Orsola Hospital, Italy | OXA (460) or CDDP (75)                                          | NR                  | NR            | NR         | NR                 | 41.5       | 30–60          | Closed          | NR                 | NR         | NR         | 52.8       | 0             | 70                     | [68]      |
| University of Texas MD Anderson Cancer Center, USA                          | CDDP (100)                                                      | NR                  | NR            | NR         | NR                 | 41         | 90             | Closed          | 64                 | NR         | NR         | NR         | 0             | 101                    | [69]      |
| 7 French Cancer Centers, France                                             | CDDP (50-80)                                                    | NR                  | NR            | NR         | NR                 | 42         | 60             | Open or Closed  | 27                 | NR         | NR         | NR         | 0             | 39                     | [70]      |
| Institut Jules Bordet & Hôpital de la Citadelle, Belgium                    | CDDP (50)                                                       | NR                  | NR            | NR         | NR                 | 42–43      | 60             | Open            | NR                 | 92.3       | NR         | NR         | 0             | 16                     | [71]      |
| AC Camargo Cancer Center, Brasil                                            | MMC (10) + CDDP (50)                                            | Dialysis            | NR            | 4          | NR                 | 41–42      | 90             | Closed          | 58.3               | NR         | NR         | 49.5       | 4             | 79                     | [72]      |
| Cancer Hospital of Guangzhou Medical University, China                      | DOC (75) or CDDP (80)                                           | Saline + 5% glucose | NR            | 3-7        | 450-600            | 41.5–42.5  | 90             | NR              | 39                 | NR         | NR         | NR         | 0             | 53                     | [73]      |
| University Hospital Bonn, Germany                                           | CDDP                                                            | Saline              | NR            | 3-4        | 1500               | 42–43      | 90             | Open or Closed  | NR                 | NR         | NR         | NR         | 0             | NR                     | [74]      |
| University Hospital Bonn, Germany                                           | CDDP (60-100)                                                   | Saline              | Single dose   | 3          | NR                 | 41–43      | 90             | Closed          | NR                 | 67         | NR         | NR         | 0             | 12                     | [75]      |
| Medical Park Samsun Hospital, Turkey                                        | CDDP (75) or OXA (400)                                          | NR                  | NR            | 3-5        | NR                 | 41–43      | 60–90          | Closed          | NR                 | 95.8%      | NR         | NR         | 14.8          | 54                     | [76]      |
| Metaxa Cancer Hospital, Greece                                              | Platinum-sensitive CDDP (100) + PAC (175)<br>Platinum-resistant | NR                  | NR            | NR         | NR                 | 42.5       | 60             | Open or Closed  | 26.7               | NR         | 75         | NR         | 0             | 60                     | [77]      |

|                                                            |                                                                                           | DOX (35) + PAC (175)<br>or MCC (15) |             |                    |         |         |       |                |      |      |      |      |     |    |      |
|------------------------------------------------------------|-------------------------------------------------------------------------------------------|-------------------------------------|-------------|--------------------|---------|---------|-------|----------------|------|------|------|------|-----|----|------|
| Gynecologic Oncology Associates, USA                       | CAR (6-10 AUC)                                                                            | Saline                              | NR          | NR                 | NR      | 41.5    | 90    | Semi-open      | 5.8  | NR   | NR   | NR   | 0   | 52 | [78] |
| Catholic University of the Sacred Heart, Italy             | OXA (460) or CDDP (75)                                                                    | NR                                  | NR          | NR                 | NR      | 41.5    | 30-60 | Closed         | NR   | NR   | NR   | NR   | NR  | 22 | [79] |
| Multicenter, Italy and Germany                             | CDDP (100) + PAC (175)                                                                    | NR                                  | NR          | 4-6                | 700     | 42.5    | 60-90 | Open or Closed | 32.9 | NR   | NR   | NR   | 0   | 54 | [80] |
| 4 French Center, France                                    | CDDP or ELO or MMC                                                                        | NR                                  | NR          | NR                 | NR      | 42      | 30-60 | NR             | NR   | NR   | NR   | 75.6 | 0   | 23 | [81] |
| Cancer Hospital of the Guangzhou Medical University, China | CCDP (50) + DOX (50)                                                                      | Saline                              | NR          | 4.5-6              | 450-600 | 41-42   | 90    | Closed         | 19   | NR   | NR   | NR   | 0   | 17 | [82] |
| Kantonsspital St. Gallen, Switzerland                      | CDDP (50)                                                                                 | NR                                  | NR          | NR                 | NR      | 42      | 90    | NR             | NR   | NR   | 72.5 | 72.5 | 0   | 21 | [83] |
| Didimotichon General Hospital, Greece                      | CDDP (50) + DOX (15) or GEM (1000)                                                        | NR                                  | NR          | 3                  | 2000    | 42.5-43 | 60-90 | Open           | 37   | NR   | NR   | 54   | 0   | 43 | [84] |
| National Cancer Institute Milan, Italy                     | Before 1997<br>CDDP (42 mg/L) + MMC (3.3)<br>After 1997<br>CDDP (42 mg/L) + DOX (15 mg/L) | NR                                  | NR          | 4-6                | 700     | 42.5    | 90    | Closed         | 25.7 | NR   | NR   | 23   | 5.3 | 56 | [85] |
| Ospedali Riuniti di Bergamo, Italy                         | CDDP (175) and/or PAC (175) and/or DOX (35)                                               | NR                                  | NR          | NR                 | NR      | 41.5    | 90    | Open           | NR   | 95   | 60   | NR   | 2.6 | 39 | [86] |
| 8 French centers, France                                   | OXA (460)                                                                                 | Dextrose                            | NR          | 2 L/m <sup>2</sup> | NR      | 42-44   | 30    | Open           | NR   | 93   | NR   | NR   | 0   | 31 | [87] |
| Clinical Center of Serbia, Serbia                          | DOX (0.1 mg/kg) or CDDP (15)                                                              | Ringer's lactate                    | NR          | 2                  | NR      | 40      | 120   | Closed         | 38.1 | NR   | NR   | 67   | 3   | 56 | [88] |
| National Cancer Center, Korea                              | CDDP (75)                                                                                 | 1.5% Dextrose                       | NR          | 4                  | NR      | 41.5    | 90    | Closed         | NR   | NR   | NR   | NR   | 0   | 30 | [89] |
| Catholic University of the Sacred Heart, Italy             | OXA (460)                                                                                 | 5% Glucosate                        | Single dose | 5                  | 600-800 | 41.5    | 30    | Closed         | NR   | 96   | NR   | NR   | 0   | 25 | [90] |
| Uppsala University Hospital, Sweden                        | CDDP (50) + DOX (15)                                                                      | Dianeal                             | NR          | NR                 | NR      | 42-44   | 30    | Open           | NR   | 72.3 | NR   | NR   | 0   | 6  | [38] |
| University La Sapienza of Rome, Italy                      | CDDP (75)                                                                                 | NR                                  | NR          | 4-6                | 500     | 42-43   | 60    | Closed         | 30.4 | NR   | NR   | 16.7 | 4.2 | 45 | [91] |
| Crete University Medical School, Greece                    | PAC (175)                                                                                 | Cremophor EL                        | NR          | NR                 | NR      | 41-43   | 120   | Closed         | 65.6 | NR   | NR   | NR   | 0   | 13 | [92] |
| Wake Forest University Baptist Medical Center, USA         | CAR (400-1200)                                                                            | Isotonic Saline                     | NR          | 2-3                | 600-800 | 39-43.5 | 90    | Closed         | NR   | NR   | NR   | NR   | 0   | 17 | [93] |
| National Cancer Institute of Milan, Italy                  | CDDP (43 mg/L) + DOX (15.25 mg/L)                                                         | NR                                  | NR          | NR                 | NR      | 42-43.5 | 60-90 | Closed         | NR   | NR   | NR   | NR   | 0.9 | 41 | [94] |

|                                                                |                                   |                  |    |     |          |           |       |                |      |    |    |      |     |     |       |
|----------------------------------------------------------------|-----------------------------------|------------------|----|-----|----------|-----------|-------|----------------|------|----|----|------|-----|-----|-------|
| 4 Argentine gynecological services, Argentina                  | CDDP (100)                        | NR               | NR | NR  | 400      | 41-43     | 60    | Open or Closed | 64.4 | NR | NR | 55   | NR  | 29  | [95]  |
| San Giovanni Battista Antica Sede Hospital, Italy              | CDDP (100-150)                    | NR               | NR | 4-6 | 900-1200 | 41.5-42.5 | 60    | Closed         | 28.1 | 80 | 32 | 12   | 3.3 | 30  | [96]  |
| St. Mary's Hospital in the Catholic University of Korea, Korea | CAR (350)                         | Ringer's lactate | NR | 6   | NR       | 43-44     | 90    | PCE            | NR   | NR | NR | 63.4 | 0   | 117 | [97]  |
| National Cancer Institute of Milan, Italy                      | CDDP (43 mg/L) + DOX (15.25 mg/L) | NR               | NR | NR  | NR       | 42.5      | 60-90 | Closed         | NR   | NR | NR | NR   | 0.6 | 36  | [98]  |
| BioMed-Hospital, Germany                                       | CDDP 9100) or CAR (450)           | Saline           | NR | 3-4 | 190-220  | 42-43     | 60    | Closed         | 49   | 65 | 30 | 16   | NR  | 36  | [99]  |
| National Cancer Institute, Milan, Italy                        | CDDP (25) + MMC (3.3)             | Polysaline       | NR | NR  | 600      | 42.5      | 60    | Closed         | NR   | NR | 71 | NR   | 4   | 27  | [100] |
| The Netherlands Cancer Institute, the Netherlands              | CDDP (50-70)                      | Saline           | NR | 3   | 1000     | 40        | 90    | Open           | NR   | 80 | 20 | 20   | 0   | 5   | [101] |

Table S3. Gastric origin.

| Institute, Country                                                                       | Drug(s) and dosage (mg/m <sup>2</sup> )         | Carrier solution            | Drug schedule | Volume (L) | Flow rate (mL/min) | Temp. (°C) | Duration (min) | Delivery method | Median OS (months) | 1-year (%) | 3-year (%) | 5-year (%) | Mortality (%) | No of HIPEC procedures | Reference |
|------------------------------------------------------------------------------------------|-------------------------------------------------|-----------------------------|---------------|------------|--------------------|------------|----------------|-----------------|--------------------|------------|------------|------------|---------------|------------------------|-----------|
| Cancer Center of Guangzhou Medical University, China                                     | 5-FU (20 mg) + CDDP (100 mg)                    | Saline                      | NR            | 1-3        | 600                | 43         | 60             | Open            | NR                 | NR         | NR         | NR         | NR            | NR                     | [102]     |
| Dutch Multicenter, The Netherlands                                                       | OXA (460) + DOC (0-150)                         | NR                          | NR            | NR         | NR                 | 41-42      | 30             | Open            | NR                 | NR         | NR         | NR         | NR            | 19                     | [103]     |
| University Hospitals KU Leuven, Belgium                                                  | CDDP (100)                                      | Saline                      | NR            | 3-4        | NR                 | 40-41      | 60             | Open            | 16                 | 71.9       | 14.1       | 3.5        | 0             | 32                     | [104]     |
| Shiga University of Medical Science, Japan                                               | 5-FU (500-1000 mg) + MMC (10 mg) + CDDP (50 mg) | Saline                      | NR            | 5          | 1000               | 42         | 30             | Open            | NR                 | NR         | NR         | 83.3       | 0             | 12                     | [105]     |
| Hubei Cancer Clinical Study Center, China                                                | LAB (50) + DOC (60)                             | Saline                      | NR            | 3          | 400                | 42.5-43.5  | 60             | Open            | 14.3               | 58         | 40         | NR         | 0             | 52                     | [106]     |
| University Medical Center Regensburg or the St. John of God Hospital Regensburg, Germany | CDDP (75) + DOX (15)                            | NR                          | NR            | NR         | NR                 | 42-43      | 60             | Closed          | 17.2               | 71.1       | 24.1       | 6.4        | 0             | 38                     | [107]     |
| Danylo Halytsky Lviv National Medical University, Ukraine                                | MMC (12.5) + CDDP (75)                          | NR                          | NR            | NR         | NR                 | 41-43.6    | 90             | Closed          | NR                 | 68.8       | NR         | NR         | 4.1           | 49                     | [108]     |
| Multicenter, France                                                                      | OXA (250)                                       | NR                          | NR            | 2          | NR                 | 42-43      | 30             | Open or Closed  | NR                 | NR         | NR         | NR         | NR            | NR                     | [109]     |
| Uppsala University Hospital, Sweden                                                      | CDDP (50) + DOX (15) or OXA (460)               | Dianeal or 50 mg/ml Glucose | NR            | NR         | NR                 | 42-44      | 90             | Open            | 10.2               | NR         | NR         | NR         | 0             | 18                     | [110]     |
| Uppsala University Hospital, Sweden                                                      | CDDP (50) + DOX (15) or OXA (460)               | Dianeal or 50 mg/ml Glucose | NR            | NR         | NR                 | 42-44      | 90             | Open            | 14.3               | 60         | 0          | 0          | 14            | 7                      | [111]     |
| Zhongnan Hospital of Wuhan University, China                                             | CDDP (60) + MMC (30)                            | Saline                      | NR            | 6          | 500                | 42.5-43.5  | 60-90          | Open            | 11                 | 41.2       | 14.7       | NR         | 0             | 34                     | [112]     |
| The Netherlands Cancer Institute, The Netherlands                                        | MMC (35)                                        | NR                          | NR            | NR         | NR                 | 41         | 90             | NR              | NR                 | NR         | NR         | NR         | NR            | NR                     | [113]     |
| Hubei Cancer Clinical Study Center, China                                                | CDDP (120 mg) or MMC (30 mg) or HCPT (20 mg)    | Saline                      | NR            | 12         | 200                | 42.5-43.5  | 90-120         | Open            | 12                 | NR         | NR         | 75         | 3.6           | 30                     | [114]     |
| Ruijin Hospital Shanghai, China                                                          | CDDP (50 µg/ml) + MMC (5 µg/ml)                 | NR                          | NR            | 5-6        | NR                 | 42-44      | 60             | Open            | 11.8               | 52.5       | 13.2       | 5.5        | 0             | 128                    | [115]     |
| University Medical Center Regensburg, Germany                                            | CDDP (75) + DOX (15)                            | NR                          | NR            | NR         | NR                 | 42.5-43    | 60             | Closed          | NR                 | NR         | NR         | NR         | 0             | 11                     | [116]     |
| Shanghai Jiaotong University, China                                                      | CDDP (50 µg/ml) + MMC (5 µg/ml)                 | NR                          | NR            | 5-6        | NR                 | 42-43      | 60             | NR              | 60.85              | 83         | 70.5       | 67.9       | 0             | 118                    | [117]     |
| National Cancer Institute of Milan, Italy                                                | CDDP (25) + MMC (3.3)                           | NR                          | NR            | NR         | NR                 | 42-43      | 60-90          | Closed          | NR                 | NR         | NR         | NR         | 0.9           | 12                     | [94]      |



|                                                       |                             |                                      |       |      |          |                 |       |               |      |      |      |      |     |     |       |
|-------------------------------------------------------|-----------------------------|--------------------------------------|-------|------|----------|-----------------|-------|---------------|------|------|------|------|-----|-----|-------|
| Wake Forest University Baptist Medical Center, USA    | MMC (40 mg)                 | Ringer's lactate                     | ¾ - ¼ | 9    | 800-900  | 40-41           | 120   | Closed        | 7.8  | 41   | NR   | 17   | 0   | 34  | [118] |
| Centre Hospitalier Lyon-Sud, France                   | MMC (40-60)                 | NR                                   | NR    | 4-6  | 500      | Inflow<br>46-48 | 90    | Closed        | 10.3 | 48.1 | NR   | 16   | 4   | 49  | [119] |
| National Cancer Institute of Milan, Italy             | CDDP + MMC or<br>CDDP + DOX | NR                                   | NR    | NR   | NR       | 42.5            | 60-90 | Closed        | NR   | NR   | NR   | NR   | 0.6 | 12  | [98]  |
| Yokohama City University, Japan                       | CDDP (150) + MMC<br>(15)    | Saline                               | NR    | 5-6  | NR       | 42-43           | 40    | Open<br>(PCE) | NR   | NR   | NR   | 49   | 0   | 124 | [120] |
| Ludwig-Maximilians-University,<br>Germany             | CDDP (150) + MMC<br>(15)    | Ringer's lactate                     | NR    | 8    | NR       | 43.5            | 60    | NR            | NR   | NR   | NR   | NR   | NR  | 24  | [121] |
| Myongji Hospital, Korea                               | MMC (40 mg)                 | 1.5% peritoneal<br>dialysis solution | NR    | 4    | 400      | 42              | 120   | Closed        | NR   | NR   | NR   | 32.7 | 0   | 52  | [122] |
| Washington Hospital Center, USA                       | MMC (10-25)                 | 1.5% Dextrose                        | NR    | 3    | 1000     | 42-43           | 90    | Closed        | NR   | 89.2 | NR   | NR   | 1.5 | 7   | [123] |
| Centre Hospitalo-Universitaire Lyon-<br>Sud, France   | MMC (10 mg/l)               | NR                                   | NR    | NR   | NR       | Inflow<br>46-49 | 90    | Closed        | NR   | 80   | 41   | NR   | 4.8 | 42  | [124] |
| Social Insurance Funabashi Central<br>Hospital, Japan | MMC (10 µg/ml)              | Saline                               | NR    | 3-4  | 500-3000 | 43-45           | 120   | Closed        | NR   | 100  | 85   | 68   | 0   | 71  | [125] |
| Tottori University, Japan                             | MMC (10 µg/ml)              | NR                                   | NR    | NR   | 200      | 42-44           | 50-60 | Closed        | NR   | 95   | 65   | 60   | 0   | 42  | [126] |
| Chiba Municipal Hospital, Japan                       | MMC (10 µg/ml)              | NR                                   | NR    | 3-5  | NR       | 41-45           | 120   | Closed        | NR   | 80.4 | 24.5 | NR   | 0   | 29  | [127] |
| Tottori University School of Medicine,<br>Japan       | MMC (8-10 mg/l)             | Salt solution                        | NR    | 8-12 | 100-200  | 40-44           | 50-60 | Closed        | NR   | 90   | 73.7 | 63   | 0   | 59  | [128] |

Table S4. MPM origin.

| Institute, Country                                              | Drug(s) and dosage (mg/m <sup>2</sup> )                   | Carrier solution | Drug schedule | Volume (L)           | Flow rate (mL/min) | Temp. (°C)                    | Duration (min) | Delivery method | Median OS (months) | 1-year (%) | 3-year (%) | 5-year (%) | Mortality (%) | No of HIPEC procedures | Reference |
|-----------------------------------------------------------------|-----------------------------------------------------------|------------------|---------------|----------------------|--------------------|-------------------------------|----------------|-----------------|--------------------|------------|------------|------------|---------------|------------------------|-----------|
| University of Maryland School of Medicine, USA                  | CAR (600) or MMC (40)                                     | NR               | NR            | 4-6                  | 1500               | 41                            | 90             | Closed          | 32.8               | 70         | 49         | 36         | 2             | 100                    | [129]     |
| French multicenter, France                                      | CDDP (25) + MMC (3.3) or DOX (15) or OXA (460) + IR (360) | NR               | NR            | NR                   | NR                 | 42-43                         | 30-90          | Open or Closed  | 61                 | NR         | NR         | 53         | 5             | 24                     | [130]     |
| St George Hospital, Australia                                   | CDDP (100) + MMC (12.5)                                   | Dianeal          | NR            | 2                    | NR                 | NR                            | 90             | Open            | NR                 | NR         | NR         | 57.1       | 5.2           | 44                     | [131]     |
| Scientific Institute for Cancer Research and Treatment, Italy   | CDDP + MMC                                                | NR               | NR            | NR                   | NR                 | NR                            | NR             | NR              | 65                 | 63         | NR         | 44         | 7.1           | 42                     | [132]     |
| Centre Hospitalier Lyon Sud, France                             | CDDP (20) + DOX (15)                                      | NR               | NR            | NR                   | NR                 | 42                            | 90             | Closed          | NR                 | 100        | NR         | NR         | 0             | 13                     | [133]     |
| Centre Hospitalier Lyon Sud, France                             | CDDP + MMC                                                | NR               | NR            | NR                   | NR                 | 42-42.5                       | 90             | Closed          | NR                 | NR         | NR         | NR         | 0             | 3                      | [134]     |
| Fondazione IRCCS Istituto Nazionale dei Tumori di Milano, Italy | CDDP (25) + MMC (3.3) + DOX (15)                          | NR               | NR            | NR                   | NR                 | 42-43                         | NR             | Closed          | NR                 | NR         | NR         | 49         | NR            | 116                    | [135]     |
| St George Hospital, Australia                                   | CDDP (50) + DOX (12)                                      | NR               | NR            | NR                   | NR                 | 42                            | 90             | Open            | 46                 | 82         | 56         | 47         | 2             | 35                     | [136]     |
| Wake Forest University Baptist Medical Center, USA              | CDDP (250) or MMC (30-40 mg)                              | NR               | NR            | NR                   | 1000               | Outflow 40                    | 60-120         | Closed          | 40.8               | NR         | 56         | 17         | 0             | 34                     | [137]     |
| 2 Italian referral centers, Italy                               | CDDP (25) + MMC (3.3) or MMC (35)                         | NR               | NR            | 3.4-6                | 600-1000           | 40-42.5                       | 60-90          | Open or Closed  | NR                 | NR         | NR         | 100        | 0             | 12                     | [138]     |
| National Cancer Institute Milan, Italy                          | CDDP (25) + MMC (3.3)                                     | NR               | NR            | 4-6                  | 700                | 42.5                          | 60-90          | Closed          | 8                  | 50         | NR         | NR         | 8             | 38                     | [139]     |
| Uppsala University Hospital, Sweden                             | CDDP (50) + DOX (15)                                      | Dianeal          | NR            | NR                   | NR                 | 42-44                         | 90             | Open            | NR                 | 72.5       | NR         | NR         | <1            | 5                      | [38]      |
| Institut Gustave-Roussy, France                                 | OXA + IR or CDDP                                          | NR               | NR            | NR                   | 1000               | 42-45                         | 30             | Open or Closed  | 100                | NR         | NR         | 63         | 4             | 26                     | [140]     |
| National Cancer Institute Milan, Italy                          | CDDP (43 mg/L) + DOX (15 mg/L)                            | NR               | NR            | 4-6                  | 700                | 42.5                          | 60             | Closed          | NR                 | 100        | 90         | 90         | 0             | 13                     | [138]     |
| National Cancer Institute Milan, Italy                          | CDDP (43 mg/L) + DOX (15 mg/L)                            | NR               | NR            | NR                   | NR                 | 42-43                         | 60-90          | Closed          | NR                 | NR         | NR         | NR         | 0.9           | 50                     | [94]      |
| National Cancer Institute Milan, Italy                          | CDDP (25) + MMC (3.3)                                     | NR               | NR            | 3.5 L/m <sup>2</sup> | 600                | 42.5                          | 600            | Closed          | NR                 | 88         | 72         | 55         | 0             | 49                     | [141]     |
| National Cancer Institute Milan, Italy                          | CDDP (43 mg/L) + DOX (15 mg/L)                            | NR               | NR            | NR                   | NR                 | 42-43                         | 60-90          | Closed          | NR                 | NR         | NR         | NR         | 0             | 34                     | [98]      |
| Centre Hospitalo-Universitaire Lyon Sud, France                 | MMC (0.5 mg/kg) + CDDP (0.7 mg/kg)                        | NR               | NR            | 4-6                  | 500                | Inflow 44-49<br>Outflow 41-43 | 90             | Closed          | 32                 | NR         | NR         | NR         | 0             | 5                      | [55]      |
| National Cancer Institute Milan, Italy                          | CDDP (25) + MMC (3.3) or CDDP (25) + DOX (7)              | NR               | NR            | 4-6                  | 600                | 42.5                          | 60-90          | Closed          | NR                 | NR         | 69         | NR         | 0             | 19                     | [142]     |

Table S5. PMP origin.

| Institute, Country                                           | Drug(s) and dosage (mg/m <sup>2</sup> ) | Carrier solution | Drug schedule | Volume (L)         | Flow rate (mL/min) | Temp. (°C) | Duration (min) | Delivery method | Median OS (months) | 1-year (%) | 3-year (%) | 5-year (%) | Mortality (%) | No of HIPEC procedures | Reference |
|--------------------------------------------------------------|-----------------------------------------|------------------|---------------|--------------------|--------------------|------------|----------------|-----------------|--------------------|------------|------------|------------|---------------|------------------------|-----------|
| St George Hospital, Australia                                | MMC (10-12.5) or OXA (460)              | 1.5% Dextrose    | NR            | 3                  | NR                 | 42         | 90             | Open            | 104                | NR         | NR         | 64         | 1.6           | 386                    | [143]     |
| Fondazione IRCCS Istituto Nazionale Tumori, Italy            | CDDP (25) or MMC (3.3)                  | NR               | NR            | 4-6                | 700                | 42.5       | 60             | Closed          | NR                 | 95         | 80         | 72         | 4             | 225                    | [144]     |
| Princess Alexandra Hospital, Australia                       | MMC (35)                                | NR               | NR            | NR                 | NR                 | 39.5       | 90             | Open            | NR                 | 90         | NR         | NR         | 0             | 30                     | [145]     |
| Fondazione IRCCS Istituto Nazionale Tumori Milano, Italy     | CDDP (25) + MMC (3.3)                   | NR               | NR            | NR                 | NR                 | 42-43      | NR             | Closed          | NR                 | NR         | NR         | 75         | 4.9           | 226                    | [146]     |
| Basingstoke and North Hampshire Hospitals, UK                | MMC (10)                                | NR               | NR            | NR                 | NR                 | 42         | 60             | Open            | NR                 | NR         | 79.2       | 60.8       | NR            | 519                    | [147]     |
| Centre Hospitalier Lyon Sud Pierre Bénite, France            | OXA (360)                               | NR               | NR            | NR                 | NR                 | 42         | 30             | Closed          | NR                 | NR         | NR         | NR         | 0             | 36                     | [133]     |
| Hospital University Reina Sofia, Spain                       | MMC (10-12.5)                           | 1.5% Dextrose    | NR            | 4                  | 1000               | 41-43      | 60             | Open            | 36                 | NR         | NR         | 58.7       | 0             | 38                     | [148]     |
| St George Hospital, Australia                                | CDDP (50) + DOX (12)                    | NR               | NR            | NR                 | NR                 | 42         | 90             | Open            | 46                 | 82         | 56         | 47         | 2             | 118                    | [136]     |
| Uppsala University Hospital, Sweden                          | MMC (10-35)                             | Dianeal          | NR            | Nr                 | NR                 | 42-44      | 90             | Open            | NR                 | 95         | NR         | NR         | <1            | 47                     | [38]      |
| Gustave Roussy Institute, France                             | MMC or OXA (460)                        | 5% Dextrose      | NR            | 2 L/m <sup>2</sup> | NR                 | 41-43      | 30-60          | Open            | NR                 | 92         | 90         | 80         | 7.6           | 105                    | [149]     |
| National Cancer Institute Milan, Italy                       | CDDP (25) + MMC (3.3)                   | NR               | NR            | 4-6                | 700                | 42.5       | 60             | Closed          | NR                 | 100        | 90         | 78.4       | 0             | 62                     | [150]     |
| National Cancer Institute Milan, Italy                       | CDDP (25) + MMC (3.3)                   | NR               | NR            | NR                 | NR                 | 42-43      | 60-90          | Closed          | NR                 | NR         | NR         | NR         | 0.9           | 49                     | [94]      |
| Centre Hospitalier de l'Université de Montréal, Canada       | MMC (0.5 mg/kg) + CDDP (0.7 mg/kg)      | NR               | NR            | 4-6                | 500                | 42-42.5    | 90             | Closed          | NR                 | 100        | 78         | 52         | 0             | 27                     | [151]     |
| National Cancer Institute of Milan, Italy                    | CDDP (25) + MMC (3.3)                   | Polysaline       | NR            | 4-6                | 600                | 42.5       | 60             | Closed          | NR                 | 97         | 97         | 97         | 3             | 33                     | [152]     |
| National Cancer Institute of Milan, Italy                    | CDDP + MMC or CDDP + DOX                | NR               | NR            | NR                 | NR                 | 42.5       | 60-90          | Closed          | NR                 | NR         | NR         | NR         | 0             | 36                     | [98]      |
| Istituto Nazionale per lo studio e la cura dei tumori, Italy | CDDP (25) + MMC (3.3)                   | NR               | NR            | NR                 | NR                 | 42.5       | 60             | Closed          | NR                 | NR         | NR         | 97         | 3             | 33                     | [153]     |
| National Cancer Institute of Milan, Italy                    | CDDP (25) + MMC (3.3)                   | Polysaline       | NR            | NR                 | 600                | 42.5       | 60             | Closed          | NR                 | NR         | NR         | NR         | 4.5           | 22                     | [154]     |
| Wake Forest University, USA                                  | MMC (30 mg)                             | Ringer's lactate | NR            | 2-3                | NR                 | 40.5       | 120            | Closed          | 13.4               | NR         | NR         | NR         | NR            | 3                      | [155]     |

## References:

1. van Eden, W.J.; Kok, N.F.M.; Woensdregt, K.; Huitema, A.D.R.; Boot, H.; Aalbers, A.G.J. Safety of intraperitoneal Mitomycin C versus intraperitoneal oxaliplatin in patients with peritoneal carcinomatosis of colorectal cancer undergoing cytoreductive surgery and HIPEC. *Eur. J Surg Oncol* **2018**, *44*, 220–227, doi:10.1016/j.ejso.2017.10.216.
2. Sluiter, N.R.; Rovers, K.P.; Salhi, Y.; Vlek, S.L.; Coupe, V.M.H.; Verheul, H.M.W.; Kazemier, G.; de Hingh, I.; Tuynman, J.B. Metachronous Peritoneal Metastases After Adjuvant Chemotherapy are Associated with Poor Outcome After Cytoreduction and HIPEC. *Ann Surg Oncol* **2018**, *25*, 2347–2356, doi:10.1245/s10434-018-6539-x.
3. Arjona-Sanchez, A.; Barrios, P.; Boldo-Roda, E.; Camps, B.; Carrasco-Campos, J.; Concepcion Martin, V.; Garcia-Fadrique, A.; Gutierrez-Calvo, A.; Morales, R.; Ortega-Perez, G., et al. HIPECT4: multicentre, randomized clinical trial to evaluate safety and efficacy of Hyperthermic intra-peritoneal chemotherapy (HIPEC) with Mitomycin C used during surgery for treatment of locally advanced colorectal carcinoma. *BMC Cancer* **2018**, *18*, 183, doi:10.1186/s12885-018-4096-0.
4. Kitai, T.; Yamanaka, K. Repeat cytoreduction and hyperthermic intraperitoneal chemotherapy for recurrent peritoneal carcinomatosis of appendiceal origin. *Int J Clin Oncol* **2018**, *23*, 298–304, doi:10.1007/s10147-017-1217-8.
5. Eden, M.W.J.v.; Elekonawo, M.F.M.K.; Starremans, B.B.J.; Kok, M.N.F.M.; PhD; Bremers, M.A.J.A.; PhD; Wilt, M.J.H.W.d.; PhD; Aalbers, M.A.G.J. Treatment of Isolated Peritoneal Recurrences in Patients with Colorectal Peritoneal Metastases Previously Treated with Cytoreductive Surgery and Hyperthermic Intraperitoneal Chemotherapy. *Annals of Surgical Oncology* *25*, 1992–2001, doi:10.1245/s10434-018-6423-8.
6. Mehta, A.M.; Huitema, A.D.; Burger, J.W.; Brandt-Kerkhof, A.R.; van den Heuvel, S.F.; Verwaal, V.J. Standard Clinical Protocol for Bidirectional Hyperthermic Intraperitoneal Chemotherapy (HIPEC): Systemic Leucovorin, 5-Fluorouracil, and Heated Intraperitoneal Oxaliplatin in a Chloride-Containing Carrier Solution. *Ann Surg Oncol* **2017**, *24*, 990–997, doi:10.1245/s10434-016-5665-6.
7. Park, E.J.; Baik, S.H.; Hur, H.; Min, B.S.; Kang, J.; Han, Y.D.; Cho, M.S.; Lee, K.Y.; Kim, N.K. Cytoreductive surgery with hyperthermic intraperitoneal chemotherapy for appendiceal and colorectal cancer with peritoneal carcinomatosis: Clinical outcomes at 2 tertiary referral centers in Korea. *Medicine (Baltimore)* **2017**, *96*, e6632, doi:10.1097/MD.0000000000006632.
8. Bong, T.S.H.; Tan, G.H.C.; Chia, C.; Soo, K.C.; Teo, M.C.C. Preoperative platelet-lymphocyte ratio is an independent prognostic marker and superior to carcinoembryonic antigen in colorectal peritoneal carcinomatosis patients undergoing cytoreductive surgery and hyperthermic intraperitoneal chemotherapy. *Int J Clin Oncol* **2017**, *22*, 511–518, doi:10.1007/s10147-017-1092-3.
9. Somashekhar, S.P.; Prasanna, G.; Jaka, R.; Rauthan, A.; Murthy, H.S.; Karanth, S. Hyperthermic intraperitoneal chemotherapy for peritoneal surface malignancies: A single institution Indian experience. *The National medical journal of India* **2016**, *29*, 262–266.
10. Navez, J.; Remue, C.; Leonard, D.; Bachmann, R.; Kartheuser, A.; Hubert, C.; Coubeau, L.; Komuta, M.; Van den Eynde, M.; Zech, F., et al. Surgical Treatment of Colorectal Cancer with Peritoneal and Liver Metastases Using Combined Liver and Cytoreductive Surgery and Hyperthermic Intraperitoneal Chemotherapy: Report from a Single-Centre Experience. *Ann Surg Oncol* **2016**, *23*, 666–673, doi:10.1245/s10434-016-5543-2.
11. Simkens, G.A.; Verwaal, V.J.; Lemmens, V.E.; Rutten, H.J.; de Hingh, I.H. Short-term outcome in patients treated with cytoreduction and HIPEC compared to conventional colon cancer surgery. *Medicine (Baltimore)* **2016**, *95*, e5111, doi:10.1097/md.0000000000005111.
12. Baumgartner, J.M.; Kwong, T.G.; Ma, G.L.; Messer, K.; Kelly, K.J.; Lowy, A.M. A Novel Tool for Predicting Major Complications After Cytoreductive Surgery with Hyperthermic Intraperitoneal Chemotherapy. *Ann Surg Oncol* **2016**, *23*, 1609–1617, doi:10.1245/s10434-015-5012-3.
13. Voron, T.; Eveno, C.; Jouvin, I.; Beaugerie, A.; Lo Dico, R.; Dagois, S.; Soyer, P.; Pocard, M. Cytoreductive surgery with a hyperthermic intraperitoneal chemotherapy program: Safe after 40 cases, but only controlled after 140 cases. *Eur J Surg Oncol* **2015**, *41*, 1671–1677, doi:10.1016/j.ejso.2015.09.005.

14. Huang, Y.; Alzahrani, N.A.; Alzahrani, S.E.; Zhao, J.; Liauw, W.; Morris, D.L. Cytoreductive surgery and perioperative intraperitoneal chemotherapy for peritoneal carcinomatosis in the elderly. *World J Surg Oncol* **2015**, *13*, 262, doi:10.1186/s12957-015-0682-7.
15. Teo, M.C.; Ching Tan, G.H.; Lim, C.; Chia, C.S.; Tham, C.K.; Soo, K.C. Colorectal peritoneal carcinomatosis treated with cytoreductive surgery and hyperthermic intraperitoneal chemotherapy: the experience of a tertiary Asian center. *Asian J Surg* **2015**, *38*, 65–73, doi:10.1016/j.asjsur.2014.05.001.
16. Klaver, C.E.; Musters, G.D.; Bemelman, W.A.; Punt, C.J.; Verwaal, V.J.; Dijkgraaf, M.G.; Aalbers, A.G.; van der Bilt, J.D.; Boerma, D.; Bremers, A.J., et al. Adjuvant hyperthermic intraperitoneal chemotherapy (HIPEC) in patients with colon cancer at high risk of peritoneal carcinomatosis; the COLOPEC randomized multicentre trial. *BMC Cancer* **2015**, *15*, 428, doi:10.1186/s12885-015-1430-7.
17. Baumgartner, J.M.; Tobin, L.; Heavey, S.F.; Kelly, K.J.; Roeland, E.J.; Lowy, A.M. Predictors of progression in high-grade appendiceal or colorectal peritoneal carcinomatosis after cytoreductive surgery and hyperthermic intraperitoneal chemotherapy. *Ann Surg Oncol* **2015**, *22*, 1716–1721, doi:10.1245/s10434-014-3985-y.
18. Shimizu, T.; Sonoda, H.; Murata, S.; Takebayashi, K.; Ohta, H.; Miyake, T.; Mekata, E.; Shiomi, H.; Naka, S.; Tani, T. Hyperthermic intraperitoneal chemotherapy using a combination of mitomycin C, 5-fluorouracil, and oxaliplatin in patients at high risk of colorectal peritoneal metastasis: A Phase I clinical study. *Eur J Surg Oncol* **2014**, *40*, 521–528, doi:10.1016/j.ejso.2013.12.005.
19. Shimizu, T.; Murata, S.; Sonoda, H.; Mekata, E.; Ohta, H.; Takebayashi, K.; Miyake, T.; Tani, T. Hyperthermic intraperitoneal chemotherapy with mitomycin C and 5-fluorouracil in patients at high risk of peritoneal metastasis from colorectal cancer: A preliminary clinical study. *Mol Clin Oncol* **2014**, *2*, 399–404, doi:10.3892/mco.2014.244.
20. Ceelen, W.; Van Nieuwenhove, Y.; Putte, D.V.; Pattyn, P. Neoadjuvant chemotherapy with bevacizumab may improve outcome after cytoreduction and hyperthermic intraperitoneal chemoperfusion (HIPEC) for colorectal carcinomatosis. *Ann Surg Oncol* **2014**, *21*, 3023–3028, doi:10.1245/s10434-014-3713-7.
21. Baratti, D.; Kusamura, S.; Iusco, D.; Bonomi, S.; Grassi, A.; Virzi, S.; Leo, E.; Deraco, M. Postoperative complications after cytoreductive surgery and hyperthermic intraperitoneal chemotherapy affect long-term outcome of patients with peritoneal metastases from colorectal cancer: a two-center study of 101 patients. *Dis Colon Rectum* **2014**, *57*, 858–868, doi:10.1097/DCR.0000000000000149.
22. Shen, P.; Thomas, C.R.; Fenstermaker, J.; Aklilu, M.; McCoy, T.P.; Levine, E.A. Phase II trial of adjuvant oral thalidomide following cytoreductive surgery and hyperthermic intraperitoneal chemotherapy for peritoneal surface disease from colorectal/appendiceal cancer. *J Gastrointest Cancer* **2014**, *45*, 268–275, doi:10.1007/s12029-014-9578-y.
23. Huang, C.Q.; Feng, J.P.; Yang, X.J.; Li, Y. Cytoreductive surgery plus hyperthermic intraperitoneal chemotherapy improves survival of patients with peritoneal carcinomatosis from colorectal cancer: a case-control study from a Chinese center. *J Surg Oncol* **2014**, *109*, 730–739, doi:10.1002/jso.23545.
24. Virzi, S.; Iusco, D.; Baratti, D.; Bonomi, S.; Grassi, A.; Kusamura, S.; Deraco, M. Pilot study of adjuvant hyperthermic intraperitoneal chemotherapy in patients with colorectal cancer at high risk for the development of peritoneal metastases. *Tumori* **2013**, *99*, 589–595, doi:10.1700/1377.15307.
25. Teo, M.C.; Tan, G.H.; Tham, C.K.; Lim, C.; Soo, K.C. Cytoreductive surgery and hyperthermic intraperitoneal chemotherapy in Asian patients: 100 consecutive patients in a single institution. *Ann Surg Oncol* **2013**, *20*, 2968–2974, doi:10.1245/s10434-013-2947-0.
26. Iversen, L.H.; Rasmussen, P.C.; Hagemann-Madsen, R.; Laurberg, S. Cytoreductive surgery and hyperthermic intraperitoneal chemotherapy for peritoneal carcinomatosis: the Danish experience. *Colorectal Dis* **2013**, *15*, e365–372, doi:10.1111/codi.12185.
27. Harrison, L.E.; Tiesi, G.; Razavi, R.; Wang, C.C. A phase I trial of thermal sensitization using induced oxidative stress in the context of HIPEC. *Ann Surg Oncol* **2013**, *20*, 1843–1850, doi:10.1245/s10434-013-2874-0.
28. Hompes, D.; D'Hoore, A.; Van Cutsem, E.; Fieuws, S.; Ceelen, W.; Peeters, M.; Van der Speeten, K.; Bertrand, C.; Legendre, H.; Kerger, J. The treatment of peritoneal carcinomatosis of colorectal cancer with complete cytoreductive surgery and hyperthermic intraperitoneal peroperative chemotherapy (HIPEC) with oxaliplatin: a Belgian multicentre prospective phase II clinical study. *Ann Surg Oncol* **2012**, *19*, 2186–2194, doi:10.1245/s10434-012-2264-z.

29. Cotte, E.; Passot, G.; Tod, M.; Bakrin, N.; Gilly, F.N.; Steghens, A.; Mohamed, F.; Glehen, O. Closed abdomen hyperthermic intraperitoneal chemotherapy with irinotecan and mitomycin C: a phase I study. *Ann Surg Oncol* **2011**, *18*, 2599–2603, doi:10.1245/s10434-011-1651-1.
30. Cavaliere, F.; De Simone, M.; Virzi, S.; Deraco, M.; Rossi, C.R.; Garofalo, A.; Di Filippo, F.; Giannarelli, D.; Vaira, M.; Valle, M., et al. Prognostic factors and oncologic outcome in 146 patients with colorectal peritoneal carcinomatosis treated with cytoreductive surgery combined with hyperthermic intraperitoneal chemotherapy: Italian multicenter study S.I.T.I.L.O. *Eur J Surg Oncol* **2011**, *37*, 148–154, doi:10.1016/j.ejso.2010.10.014.
31. Chua, T.C.; Morris, D.L.; Esquivel, J. Impact of the peritoneal surface disease severity score on survival in patients with colorectal cancer peritoneal carcinomatosis undergoing complete cytoreduction and hyperthermic intraperitoneal chemotherapy. *Ann Surg Oncol* **2010**, *17*, 1330–1336, doi:10.1245/s10434-009-0866-x.
32. Yang, X.J.; Li, Y.; al-shammaa Hassan, A.H.; Yang, G.L.; Liu, S.Y.; Lu, Y.L.; Zhang, J.W.; Yonemura, Y. Cytoreductive surgery plus hyperthermic intraperitoneal chemotherapy improves survival in selected patients with peritoneal carcinomatosis from abdominal and pelvic malignancies: results of 21 cases. *Ann Surg Oncol* **2009**, *16*, 345–351, doi:10.1245/s10434-008-0226-2.
33. Lanuke, K.; Mack, L.A.; Temple, W.J. Phase II study of regional treatment for peritoneal carcinomatosis. *Am J Surg* **2009**, *197*, 614–618; discussion 618, doi:10.1016/j.amjsurg.2008.12.026.
34. Chouillard, E.; Ata, T.; De Jonghe, B.; Maggiori, L.; Helmy, N.; Coscas, Y.; Outin, H. Staged laparoscopic adjuvant intraperitoneal chemohyperthermia after complete resection for locally advanced colorectal or gastric cancer: a preliminary experience. *Surg Endosc* **2009**, *23*, 363–369, doi:10.1007/s00464-008-9946-4.
35. Asero, S.; Caruso, M.; Vallone, N.; Luciani, A.G.; Lombardo, V.; Terranova, G.; Ettore, G.; Giannone, G. Cytoreductive surgery (cs) and hyperthermic intraperitoneal chemotherapy (hipec) in treatment of peritoneal surface malignancies: report of a phase II clinical study. *In Vivo* **2009**, *23*, 645–647.
36. Chua, T.C.; Pelz, J.O.; Kerscher, A.; Morris, D.L.; Esquivel, J. Critical analysis of 33 patients with peritoneal carcinomatosis secondary to colorectal and appendiceal signet ring cell carcinoma. *Ann Surg Oncol* **2009**, *16*, 2765–2770, doi:10.1245/s10434-009-0536-z.
37. Verwaal, V.J.; Bruin, S.; Boot, H.; van Slooten, G.; van Tinteren, H. 8-year follow-up of randomized trial: cytoreduction and hyperthermic intraperitoneal chemotherapy versus systemic chemotherapy in patients with peritoneal carcinomatosis of colorectal cancer. *Ann Surg Oncol* **2008**, *15*, 2426–2432, doi:10.1245/s10434-008-9966-2.
38. van Leeuwen, B.L.; Graf, W.; Pahlman, L.; Mahteme, H. Swedish experience with peritonectomy and HIPEC. HIPEC in peritoneal carcinomatosis. *Ann Surg Oncol* **2008**, *15*, 745–753, doi:10.1245/s10434-007-9700-5.
39. Stewart, J.H.t.; Shen, P.; Russell, G.; Fenstermaker, J.; McWilliams, L.; Coldrun, F.M.; Levine, K.E.; Jones, B.T.; Levine, E.A. A phase I trial of oxaliplatin for intraperitoneal hyperthermic chemoperfusion for the treatment of peritoneal surface dissemination from colorectal and appendiceal cancers. *Ann Surg Oncol* **2008**, *15*, 2137–2145, doi:10.1245/s10434-008-9967-1.
40. Harrison, L.E.; Bryan, M.; Pliner, L.; Saunders, T. Phase I trial of pegylated liposomal doxorubicin with hyperthermic intraperitoneal chemotherapy in patients undergoing cytoreduction for advanced intra-abdominal malignancy. *Ann Surg Oncol* **2008**, *15*, 1407–1413, doi:10.1245/s10434-007-9718-8.
41. Gusani, N.J.; Cho, S.W.; Colovos, C.; Seo, S.; Franko, J.; Richard, S.D.; Edwards, R.P.; Brown, C.K.; Holtzman, M.P.; Zeh, H.J., et al. Aggressive surgical management of peritoneal carcinomatosis with low mortality in a high-volume tertiary cancer center. *Ann Surg Oncol* **2008**, *15*, 754–763, doi:10.1245/s10434-007-9701-4.
42. Elias, D.; Pocard, M.; Goere, D. HIPEC with oxaliplatin in the treatment of peritoneal carcinomatosis of colorectal origin. *Cancer Treat Res* **2007**, *134*, 303–318.
43. Piso, P.; Dahlke, M.H.; Ghali, N.; Iesalnieks, I.; Loss, M.; Popp, F.; von Breitenbuch, P.; Agha, A.; Lang, S.A.; Kullmann, F., et al. Multimodality treatment of peritoneal carcinomatosis from colorectal cancer: first results of a new German centre for peritoneal surface malignancies. *Int J Colorectal Dis* **2007**, *22*, 1295–1300, doi:10.1007/s00384-007-0313-z.
44. Zanon, C.; Bortolini, M.; Chiappino, I.; Simone, P.; Bruno, F.; Gaglia, P.; Airoidi, M.; Deriu, L.; Mashiah, A. Cytoreductive surgery combined with intraperitoneal chemohyperthermia for the treatment of advanced colon cancer. *World J Surg* **2006**, *30*, 2025–2032, doi:10.1007/s00268-005-0486-y.

45. Yan, T.D.; Chu, F.; Links, M.; Kam, P.C.; Glenn, D.; Morris, D.L. Cytoreductive surgery and perioperative intraperitoneal chemotherapy for peritoneal carcinomatosis from colorectal carcinoma: non-mucinous tumour associated with an improved survival. *Eur J Surg Oncol* **2006**, *32*, 1119–1124, doi:10.1016/j.ejso.2006.06.007.
46. Elias, D.; Raynard, B.; Farkhondeh, F.; Goere, D.; Rouquie, D.; Ciuchendea, R.; Pocard, M.; Ducreux, M. Peritoneal carcinomatosis of colorectal origin. *Gastroenterol Clin Biol* **2006**, *30*, 1200–1204.
47. Elias, D.; Raynard, B.; Bonnay, M.; Pocard, M. Heated intra-operative intraperitoneal oxaliplatin alone and in combination with intraperitoneal irinotecan: Pharmacologic studies. *Eur J Surg Oncol* **2006**, *32*, 607–613, doi:10.1016/j.ejso.2006.03.004.
48. da Silva, R.G.; Sugarbaker, P.H. Analysis of prognostic factors in seventy patients having a complete cytoreduction plus perioperative intraperitoneal chemotherapy for carcinomatosis from colorectal cancer. *J Am Coll Surg* **2006**, *203*, 878–886, doi:10.1016/j.jamcollsurg.2006.08.024.
49. Verwaal, V.J.; van Ruth, S.; Witkamp, A.; Boot, H.; van Slooten, G.; Zoetmulder, F.A. Long-term survival of peritoneal carcinomatosis of colorectal origin. *Ann Surg Oncol* **2005**, *12*, 65–71, doi:10.1007/s10434-004-1167-z.
50. Kecmanovic, D.M.; Pavlov, M.J.; Ceranic, M.S.; Sepetkovski, A.V.; Kovacevic, P.A.; Stamenkovic, A.B. Treatment of peritoneal carcinomatosis from colorectal cancer by cytoreductive surgery and hyperthermic perioperative intraperitoneal chemotherapy. *Eur J Surg Oncol* **2005**, *31*, 147–152, doi:10.1016/j.ejso.2004.09.021.
51. Verwaal, V.J.; van Tinteren, H.; van Ruth, S.; Zoetmulder, F.A. Predicting the survival of patients with peritoneal carcinomatosis of colorectal origin treated by aggressive cytoreduction and hyperthermic intraperitoneal chemotherapy. *Br J Surg* **2004**, *91*, 739–746, doi:10.1002/bjs.4516.
52. Elias, D.; Sideris, L.; Pocard, M.; Ede, C.; Ben Hassouna, D.; Ducreux, M.; Boige, V.; Cote, J.F.; Lasser, P. Efficacy of intraperitoneal chemohyperthermia with oxaliplatin in colorectal peritoneal carcinomatosis. Preliminary results in 24 patients. *Ann Oncol* **2004**, *15*, 781–785.
53. Verwaal, V.J.; van Ruth, S.; de Bree, E.; van Sloothen, G.W.; van Tinteren, H.; Boot, H.; Zoetmulder, F.A. Randomized trial of cytoreduction and hyperthermic intraperitoneal chemotherapy versus systemic chemotherapy and palliative surgery in patients with peritoneal carcinomatosis of colorectal cancer. *J Clin Oncol* **2003**, *21*, 3737–3743, doi:10.1200/JCO.2003.04.187.
54. Pilati, P.; Mocellin, S.; Rossi, C.R.; Foletto, M.; Campana, L.; Nitti, D.; Lise, M. Cytoreductive surgery combined with hyperthermic intraperitoneal intraoperative chemotherapy for peritoneal carcinomatosis arising from colon adenocarcinoma. *Ann Surg Oncol* **2003**, *10*, 508–513.
55. Glehen, O.; Mithieux, F.; Osinsky, D.; Beaujard, A.C.; Freyer, G.; Guertsch, P.; Francois, Y.; Peyrat, P.; Panteix, G.; Vignal, J., et al. Surgery combined with peritonectomy procedures and intraperitoneal chemohyperthermia in abdominal cancers with peritoneal carcinomatosis: a phase II study. *J Clin Oncol* **2003**, *21*, 799–806, doi:10.1200/JCO.2003.06.139.
56. Fu, Q.G.; Meng, F.D.; Shen, X.D.; Guo, R.X. Efficacy of intraperitoneal thermochemotherapy and immunotherapy in intraperitoneal recurrence after gastrointestinal cancer resection. *World J Gastroenterol* **2002**, *8*, 1019–1022.
57. Elias, D.; Bonnay, M.; Puizillou, J.M.; Antoun, S.; Demirdjian, S.; El, O.A.; Pignon, J.P.; Drouard-Troalen, L.; Ouellet, J.F.; Ducreux, M. Heated intra-operative intraperitoneal oxaliplatin after complete resection of peritoneal carcinomatosis: pharmacokinetics and tissue distribution. *Ann Oncol* **2002**, *13*, 267–272.
58. Witkamp, A.J.; de Bree, E.; Kaag, M.M.; Boot, H.; Beijnen, J.H.; van Slooten, G.W.; van Coevorden, F.; Zoetmulder, F.A. Extensive cytoreductive surgery followed by intra-operative hyperthermic intraperitoneal chemotherapy with mitomycin-C in patients with peritoneal carcinomatosis of colorectal origin. *Eur J Cancer* **2001**, *37*, 979–984.
59. Beaujard, A.C.; Glehen, O.; Caillot, J.L.; Francois, Y.; Bienvenu, J.; Panteix, G.; Garbit, F.; Grandclement, E.; Vignal, J.; Gilly, F.N. Intraperitoneal chemohyperthermia with mitomycin C for digestive tract cancer patients with peritoneal carcinomatosis. *Cancer* **2000**, *88*, 2512–2519.
60. Tsiftsis, D.; de Bree, E.; Romanos, J.; Petrou, A.; Sanidas, E.; Askoxylakis, J.; Zervos, K.; Michaloudis, D. Peritoneal expansion by artificially produced ascites during perfusion chemotherapy. *Arch Surg* **1999**, *134*, 545–549; discussion 550.
61. Gilly, F.N.; Beaujard, A.; Glehen, O.; Grandclement, E.; Caillot, J.L.; Francois, Y.; Sadeghi-Looyeh, B.; Gueugniaud, P.Y.; Garbit, F.; Benoit, M., et al. Peritonectomy combined with intraperitoneal

- chemohyperthermia in abdominal cancer with peritoneal carcinomatosis: phase I-II study. *Anticancer Res* **1999**, *19*, 2317–2321.
62. Yarema, R.; Fetsych, T.; Volodko, N.; capital O, C.M.; Petronchak, O.; Huley, R.; Mylyan, Y.; Glehen, O. Evaluation of the peritoneal surface disease severity score (PSDSS) in ovarian cancer patients undergoing cytoreductive surgery and HIPEC: Two pathogenetic types based study. *J Surg Oncol* **2018**, *10.1002/jso.25087*, doi:10.1002/jso.25087.
  63. van Driel, W.J.; Koole, S.N.; Sikorska, K.; Schagen van Leeuwen, J.H.; Schreuder, H.W.R.; Hermans, R.H.M.; de Hingh, I.; van der Velden, J.; Arts, H.J.; Massuger, L., et al. Hyperthermic Intraperitoneal Chemotherapy in Ovarian Cancer. *N Engl J Med* **2018**, *378*, 230–240, doi:10.1056/NEJMoa1708618.
  64. Pavlov, M.J.; Ceranic, M.S.; Latincic, S.M.; Sabljak, P.V.; Kecmanovic, D.M.; Sugarbaker, P.H. Cytoreductive surgery and hyperthermic intraperitoneal chemotherapy for the treatment of advanced epithelial and recurrent ovarian carcinoma: a single center experience. *Int J Hyperthermia* **2018**, *34*, 564–569, doi:10.1080/02656736.2017.1371341.
  65. Batista, T.P.; Carneiro, V.C.G.; Tancredi, R.; Teles, A.L.B.; Badiglian-Filho, L.; Leao, C.S. Neoadjuvant chemotherapy followed by fast-track cytoreductive surgery plus short-course hyperthermic intraperitoneal chemotherapy (HIPEC) in advanced ovarian cancer: preliminary results of a promising all-in-one approach. *Cancer Manag Res* **2017**, *9*, 869–878, doi:10.2147/CMAR.S153327.
  66. Sun, J.H.; Ji, Z.H.; Yu, Y.; Wu, H.T.; Huang, C.Q.; Zhang, Q.; Yang, X.J.; Yonemura, Y.; Li, Y. Cytoreductive Surgery plus Hyperthermic Intraperitoneal Chemotherapy to Treat Advanced/Recurrent Epithelial Ovarian Cancer: Results from a Retrospective Study on Prospectively Established Database. *Transl Oncol* **2016**, *9*, 130–138, doi:10.1016/j.tranon.2016.02.002.
  67. Sanchez-Garcia, S.; Villarejo-Campos, P.; Padilla-Valverde, D.; Amo-Salas, M.; Martin-Fernandez, J. Intraperitoneal chemotherapy hyperthermia (HIPEC) for peritoneal carcinomatosis of ovarian cancer origin by fluid and CO2 recirculation using the closed abdomen technique (PRS-1.0 Combat): A clinical pilot study. *Int J Hyperthermia* **2016**, *32*, 488–495, doi:10.3109/02656736.2016.1152515.
  68. Petrillo, M.; De Iaco, P.; Cianci, S.; Perrone, M.; Costantini, B.; Ronsini, C.; Scambia, G.; Fagotti, A. Long-Term Survival for Platinum-Sensitive Recurrent Ovarian Cancer Patients Treated with Secondary Cytoreductive Surgery Plus Hyperthermic Intraperitoneal Chemotherapy (HIPEC). *Ann Surg Oncol* **2016**, *23*, 1660–1665, doi:10.1245/s10434-015-5050-x.
  69. Hayes-Jordan, A.; Lopez, C.; Green, H.L.; Xiao, L.C.; Huh, W.; Herzog, C.E. Cytoreductive surgery (CRS) and hyperthermic intraperitoneal chemotherapy (HIPEC) in pediatric ovarian tumors: a novel treatment approach. *Pediatr Surg Int* **2016**, *32*, 71–73, doi:10.1007/s00383-015-3814-9.
  70. Gouy, S.; Ferron, G.; Glehen, O.; Bayar, A.; Marchal, F.; Pomel, C.; Quenet, F.; Bereder, J.M.; Le Deley, M.C.; Morice, P. Results of a multicenter phase I dose-finding trial of hyperthermic intraperitoneal cisplatin after neoadjuvant chemotherapy and complete cytoreductive surgery and followed by maintenance bevacizumab in initially unresectable ovarian cancer. *Gynecol Oncol* **2016**, *142*, 237–242, doi:10.1016/j.ygyno.2016.05.032.
  71. D'Hondt, V.; Goffin, F.; Roca, L.; Dresse, D.; Leroy, C.; Kerger, J.; Cordier, L.; de Forges, H.; Veys, I.; Liberale, G. Interval Cytoreductive Surgery and Hyperthermic Intraperitoneal Chemotherapy in First-Line Treatment for Advanced Ovarian Carcinoma: A Feasibility Study. *Int J Gynecol Cancer* **2016**, *26*, 912–917, doi:10.1097/IGC.0000000000000696.
  72. Baiocchi, G.; Ferreira, F.O.; Mantoan, H.; da Costa, A.A.; Faloppa, C.C.; Kumagai, L.Y.; de Mello, C.A.; Takahashi, R.M.; Nakagawa, W.T.; Aguiar, S., Jr., et al. Hyperthermic Intraperitoneal Chemotherapy after Secondary Cytoreduction in Epithelial Ovarian Cancer: A Single-center Comparative Analysis. *Ann Surg Oncol* **2016**, *23*, 1294–1301, doi:10.1245/s10434-015-4991-4.
  73. Ba, M.; Long, H.; Zhang, X.; Tang, Y.; Wu, Y.; Wang, S.; Yan, Z.; Zhang, B.; Cui, S. Hyperthermic Intraperitoneal Perfusion Chemotherapy and Cytoreductive Surgery for Controlling Malignant Ascites From Ovarian Cancer. *Int J Gynecol Cancer* **2016**, *26*, 1571–1579, doi:10.1097/IGC.0000000000000809.
  74. Abramian, A.; Zivanovic, O.; Kuhn, W.; Weber, S.; Schaefer, N.; Keyver-Paik, M.D.; Kiefer, N. Introducing Hyperthermic Intraperitoneal Chemotherapy into Gynecological Oncology Practice - Feasibility and Safety Considerations: Single-Center Experience. *Oncol Res Treat* **2016**, *39*, 178–184, doi:10.1159/000445180.
  75. Zivanovic, O.; Abramian, A.; Kullmann, M.; Fuhrmann, C.; Coch, C.; Hoeller, T.; Ruehs, H.; Keyver-Paik, M.D.; Rudlowski, C.; Weber, S., et al. HIPEC ROC I: a phase I study of cisplatin administered as hyperthermic



- intraoperative intraperitoneal chemoperfusion followed by postoperative intravenous platinum-based chemotherapy in patients with platinum-sensitive recurrent epithelial ovarian cancer. *Int J Cancer* **2015**, *136*, 699–708, doi:10.1002/ijc.29011.
76. Topgul, K.; Cetinkaya, M.B.; Cigdem Arslan, N.; Gul, M.K.; Can, M.; Gursel, M.F.; Erdem, D.; Malazgirt, Z. Cytoreductive surgery (SRC) and hyperthermic intraperitoneal chemotherapy (HIPEC) for treatment of peritoneal carcinomatosis: Our initial experience and technical details. *Ulus Cerrahi Derg* **2015**, *31*, 138–147, doi:10.5152/UCD.2015.2990.
  77. Spiliotis, J.; Halkia, E.; Lianos, E.; Kalantzi, N.; Grivas, A.; Efstathiou, E.; Giassas, S. Cytoreductive surgery and HIPEC in recurrent epithelial ovarian cancer: a prospective randomized phase III study. *Ann Surg Oncol* **2015**, *22*, 1570–1575, doi:10.1245/s10434-014-4157-9.
  78. Rettenmaier, M.A.; Mendivil, A.A.; Abaid, L.N.; Brown, J.V., 3rd; Micha, J.P.; Wilcox, A.M.; Goldstein, B.H. The feasibility of administering varying high-dose consolidation hyperthermic intraperitoneal chemotherapy with carboplatin in the treatment of ovarian carcinoma. *Arch Gynecol Obstet* **2015**, *291*, 1381–1386, doi:10.1007/s00404-014-3590-0.
  79. Fagotti, A.; Costantini, B.; Gallotta, V.; Cianci, S.; Ronsini, C.; Petrillo, M.; Pacciani, M.; Scambia, G.; Fanfani, F. Minimally invasive secondary cytoreduction plus HIPEC versus open surgery plus HIPEC in isolated relapse from ovarian cancer: a retrospective cohort study on perioperative outcomes. *J Minim Invasive Gynecol* **2015**, *22*, 428–432, doi:10.1016/j.jmig.2014.11.008.
  80. Coccolini, F.; Campanati, L.; Catena, F.; Ceni, V.; Ceresoli, M.; Jimenez Cruz, J.; Lotti, M.; Magnone, S.; Napoli, J.; Rossetti, D., et al. Hyperthermic intraperitoneal chemotherapy with cisplatin and paclitaxel in advanced ovarian cancer: a multicenter prospective observational study. *J Gynecol Oncol* **2015**, *26*, 54–61, doi:10.3802/jgo.2015.26.1.54.
  81. Le Brun, J.F.; Campion, L.; Berton-Rigaud, D.; Lorimier, G.; Marchal, F.; Ferron, G.; Oger, A.S.; Dravet, F.; Jaffre, I.; Classe, J.M. Survival benefit of hyperthermic intraperitoneal chemotherapy for recurrent ovarian cancer: a multi-institutional case control study. *Ann Surg Oncol* **2014**, *21*, 3621–3627, doi:10.1245/s10434-014-3693-7.
  82. Ba, M.; Long, H.; Zhang, X.; Tang, Y.; Wu, Y.; Yu, F.; Wang, S.; Cui, S. Different sequential approaches of cytoreductive surgery and hyperthermic intraperitoneal chemotherapy in treating ovarian cancer with malignant ascites. *J Cancer Res Clin Oncol* **2014**, *140*, 1497–1506, doi:10.1007/s00432-014-1692-5.
  83. Warschkow, R.; Tarantino, I.; Lange, J.; Muller, S.A.; Schmied, B.M.; Zund, M.; Steffen, T. Does hyperthermic intraoperative chemotherapy lead to improved outcomes in patients with ovarian cancer? A single center cohort study in 111 consecutive patients. *Patient Saf Surg* **2012**, *6*, 12, doi:10.1186/1754-9493-6-12.
  84. Tentes, A.A.; Kakolyris, S.; Kyziridis, D.; Karamveri, C. Cytoreductive surgery combined with hyperthermic intraperitoneal intraoperative chemotherapy in the treatment of advanced epithelial ovarian cancer. *J Oncol* **2012**, *2012*, 358341, doi:10.1155/2012/358341.
  85. Deraco, M.; Virzi, S.; Iusco, D.R.; Puccio, F.; Macri, A.; Famulari, C.; Solazzo, M.; Bonomi, S.; Grassi, A.; Baratti, D., et al. Secondary cytoreductive surgery and hyperthermic intraperitoneal chemotherapy for recurrent epithelial ovarian cancer: a multi-institutional study. *BJOG* **2012**, *119*, 800–809, doi:10.1111/j.1471-0528.2011.03207.x.
  86. Ansaloni, L.; Agnoletti, V.; Amadori, A.; Catena, F.; Cavaliere, D.; Coccolini, F.; De Iaco, P.; Di Battista, M.; Framarini, M.; Gazzotti, F., et al. Evaluation of extensive cytoreductive surgery and hyperthermic intraperitoneal chemotherapy (HIPEC) in patients with advanced epithelial ovarian cancer. *Int J Gynecol Cancer* **2012**, *22*, 778–785, doi:10.1097/IGC.0b013e31824d836c.
  87. Pomel, C.; Ferron, G.; Lorimier, G.; Rey, A.; Lhomme, C.; Classe, J.M.; Bereder, J.M.; Quenet, F.; Meeus, P.; Marchal, F., et al. Hyperthermic intra-peritoneal chemotherapy using oxaliplatin as consolidation therapy for advanced epithelial ovarian carcinoma. Results of a phase II prospective multicentre trial. CHIPOVAC study. *Eur J Surg Oncol* **2010**, *36*, 589–593, doi:10.1016/j.ejso.2010.04.005.
  88. Pavlov, M.J.; Kovacevic, P.A.; Ceranic, M.S.; Stamenkovic, A.B.; Ivanovic, A.M.; Kecmanovic, D.M. Cytoreductive surgery and modified heated intraoperative intraperitoneal chemotherapy (HIPEC) for advanced and recurrent ovarian cancer -- 12-year single center experience. *Eur J Surg Oncol* **2009**, *35*, 1186–1191, doi:10.1016/j.ejso.2009.03.004.

89. Lim, M.C.; Kang, S.; Choi, J.; Song, Y.J.; Park, S.; Seo, S.S.; Park, S.Y. Hyperthermic intraperitoneal chemotherapy after extensive cytoreductive surgery in patients with primary advanced epithelial ovarian cancer: interim analysis of a phase II study. *Ann Surg Oncol* **2009**, *16*, 993–1000, doi:10.1245/s10434-008-0299-y.
90. Fagotti, A.; Paris, I.; Grimolizzi, F.; Fanfani, F.; Vizzielli, G.; Naldini, A.; Scambia, G. Secondary cytoreduction plus oxaliplatin-based HIPEC in platinum-sensitive recurrent ovarian cancer patients: a pilot study. *Gynecol Oncol* **2009**, *113*, 335–340, doi:10.1016/j.ygyno.2009.03.004.
91. Di Giorgio, A.; Naticchioni, E.; Biacchi, D.; Sibio, S.; Accarpio, F.; Rocco, M.; Tarquini, S.; Di Seri, M.; Ciardi, A.; Montruccoli, D., et al. Cytoreductive surgery (peritonectomy procedures) combined with hyperthermic intraperitoneal chemotherapy (HIPEC) in the treatment of diffuse peritoneal carcinomatosis from ovarian cancer. *Cancer* **2008**, *113*, 315–325, doi:10.1002/cncr.23553.
92. de Bree, E.; Rosing, H.; Filis, D.; Romanos, J.; Melissourgaki, M.; Daskalakis, M.; Pilatou, M.; Sanidas, E.; Taflampas, P.; Kalbakis, K., et al. Cytoreductive surgery and intraoperative hyperthermic intraperitoneal chemotherapy with paclitaxel: a clinical and pharmacokinetic study. *Ann Surg Oncol* **2008**, *15*, 1183–1192, doi:10.1245/s10434-007-9792-y.
93. Lentz, S.S.; Miller, B.E.; Kucera, G.L.; Levine, E.A. Intraperitoneal hyperthermic chemotherapy using carboplatin: a phase I analysis in ovarian carcinoma. *Gynecol Oncol* **2007**, *106*, 207–210, doi:10.1016/j.ygyno.2007.03.022.
94. Kusamura, S.; Younan, R.; Baratti, D.; Costanzo, P.; Favaro, M.; Gavazzi, C.; Deraco, M. Cytoreductive surgery followed by intraperitoneal hyperthermic perfusion: analysis of morbidity and mortality in 209 peritoneal surface malignancies treated with closed abdomen technique. *Cancer* **2006**, *106*, 1144–1153, doi:10.1002/cncr.21708.
95. Gori, J.; Castano, R.; Toziano, M.; Habich, D.; Staringer, J.; De Quiros, D.G.; Felci, N. Intraperitoneal hyperthermic chemotherapy in ovarian cancer. *Int J Gynecol Cancer* **2005**, *15*, 233–239, doi:10.1111/j.1525-1438.2005.15209.x.
96. Zanon, C.; Clara, R.; Chiappino, I.; Bortolini, M.; Cornaglia, S.; Simone, P.; Bruno, F.; De Riu, L.; Airoidi, M.; Pedani, F. Cytoreductive surgery and intraperitoneal chemohyperthermia for recurrent peritoneal carcinomatosis from ovarian cancer. *World J Surg* **2004**, *28*, 1040–1045, doi:10.1007/s00268-004-7461-x.
97. Ryu, K.S.; Kim, J.H.; Ko, H.S.; Kim, J.W.; Ahn, W.S.; Park, Y.G.; Kim, S.J.; Lee, J.M. Effects of intraperitoneal hyperthermic chemotherapy in ovarian cancer. *Gynecol Oncol* **2004**, *94*, 325–332, doi:10.1016/j.ygyno.2004.05.044.
98. Kusamura, S.; Deraco, M.; Baratti, D.; Inglese, M.G.; Costanzo, P.; Favaro, M.; Manzi, R.; Gavazzi, C. Cytoreductive surgery followed by intra peritoneal hyperthermic perfusion in the treatment of peritoneal surface malignancies: morbidity and mortality with closed abdomen technique. *J Exp Clin Cancer Res* **2003**, *22*, 207–212.
99. Hager, E.D.; Dziambor, H.; Hohmann, D.; Muhe, N.; Strama, H. Intraperitoneal hyperthermic perfusion chemotherapy of patients with chemotherapy-resistant peritoneal disseminated ovarian cancer. *Int J Gynecol Cancer* **2001**, *11 Suppl 1*, 57–63.
100. Deraco, M.; Rossi, C.R.; Pennacchioli, E.; Guadagni, S.; Somers, D.C.; Santoro, N.; Raspagliesi, F.; Kusamura, S.; Vaglini, M. Cytoreductive surgery followed by intraperitoneal hyperthermic perfusion in the treatment of recurrent epithelial ovarian cancer: a phase II clinical study. *Tumori* **2001**, *87*, 120–126.
101. van der Vange, N.; van Goethem, A.R.; Zoetmulder, F.A.; Kaag, M.M.; van de Vaart, P.J.; ten Bokkel Huinink, W.W.; Beijnen, J.H. Extensive cytoreductive surgery combined with intra-operative intraperitoneal perfusion with cisplatin under hyperthermic conditions (OVHIPEC) in patients with recurrent ovarian cancer: a feasibility pilot. *Eur J Surg Oncol* **2000**, *26*, 663–668, doi:10.1053/ejso.2000.0978.
102. Tu, Y.; Tian, Y.; Wu, Y.; Cui, S. Clinical significance of heat shock proteins in gastric cancer following hyperthermia stress: Indications for hyperthermic intraperitoneal chemoperfusion therapy. *Oncol Lett* **2018**, *15*, 9385–9391, doi:10.3892/ol.2018.8508.
103. van der Kaaij, R.T.; Braam, H.J.; Boot, H.; Los, M.; Cats, A.; Grootsholten, C.; Schellens, J.H.; Aalbers, A.G.; Huitema, A.D.; Knibbe, C.A., et al. Treatment of Peritoneal Dissemination in Stomach Cancer Patients With Cytoreductive Surgery and Hyperthermic Intraperitoneal Chemotherapy (HIPEC): Rationale and Design of the PERISCOPE Study. *JMIR Res Protoc* **2017**, *6*, e136, doi:10.2196/resprot.7790.

104. Topal, B.; Demey, K.; Topal, H.; Jaekers, J.; Van Cutsem, E.; Vandecaveye, V.; Sagaert, X.; Prenen, H. Cytoreductive surgery and Hyperthermic intra-operative peritoneal chemotherapy with Cisplatin for gastric peritoneal Carcinomatosis Monocentric phase-2 nonrandomized prospective clinical trial. *BMC Cancer* **2017**, *17*, 771, doi:10.1186/s12885-017-3730-6.
105. Murata, S.; Yamamoto, H.; Naitoh, H.; Yamaguchi, T.; Kaida, S.; Shimizu, T.; Shiomi, H.; Naka, S.; Tani, T.; Tani, M. Feasibility and safety of hyperthermic intraperitoneal chemotherapy using 5-fluorouracil combined with cisplatin and mitomycin C in patients undergoing gastrectomy for advanced gastric cancer. *J Surg Oncol* **2017**, *116*, 1159–1165, doi:10.1002/jso.24771.
106. Wu, H.T.; Peng, K.W.; Ji, Z.H.; Sun, J.H.; Zhang, Q.; Yang, X.J.; Huang, C.Q.; Li, Y. Cytoreductive surgery plus hyperthermic intraperitoneal chemotherapy with lobaplatin and docetaxel to treat synchronous peritoneal carcinomatosis from gastric cancer: Results from a Chinese center. *Eur J Surg Oncol* **2016**, *42*, 1024–1034, doi:10.1016/j.ejso.2016.04.053.
107. Boerner, T.; Graichen, A.; Jeiter, T.; Zemann, F.; Renner, P.; Marz, L.; Soeder, Y.; Schlitt, H.J.; Piso, P.; Dahlke, M.H. CRS-HIPEC Prolongs Survival but is Not Curative for Patients with Peritoneal Carcinomatosis of Gastric Cancer. *Ann Surg Oncol* **2016**, *23*, 3972–3977, doi:10.1245/s10434-016-5306-0.
108. Yarema, R.R.; Ohorchak, M.A.; Zubarev, G.P.; Mylyan, Y.P.; Oliynyk, Y.Y.; Zubarev, M.G.; Gyrya, P.I.; Kovalchuk, Y.J.; Safiyan, V.I.; Fetsych, T.G. Hyperthermic intraperitoneal chemoperfusion in combined treatment of locally advanced and disseminated gastric cancer: results of a single-centre retrospective study. *Int J Hyperthermia* **2014**, *30*, 159–165, doi:10.3109/02656736.2014.893451.
109. Glehen, O.; Passot, G.; Villeneuve, L.; Vaudoyer, D.; Bin-Dorel, S.; Boschetti, G.; Piaton, E.; Garofalo, A. GASTRICHIP: D2 resection and hyperthermic intraperitoneal chemotherapy in locally advanced gastric carcinoma: a randomized and multicenter phase III study. *BMC Cancer* **2014**, *14*, 183, doi:10.1186/1471-2407-14-183.
110. Hultman, B.; Lind, P.; Glimelius, B.; Sundbom, M.; Nygren, P.; Haglund, U.; Mahteme, H. Phase II study of patients with peritoneal carcinomatosis from gastric cancer treated with preoperative systemic chemotherapy followed by peritonectomy and intraperitoneal chemotherapy. *Acta Oncol* **2013**, *52*, 824–830, doi:10.3109/0284186X.2012.702925.
111. Hultman, B.; Lundkvist, J.; Glimelius, B.; Nygren, P.; Mahteme, H. Costs and clinical outcome of neoadjuvant systemic chemotherapy followed by cytoreductive surgery and hyperthermic intraperitoneal chemotherapy in peritoneal carcinomatosis from gastric cancer. *Acta Oncol* **2012**, *51*, 112–121, doi:10.3109/0284186X.2011.594809.
112. Yang, X.J.; Huang, C.Q.; Suo, T.; Mei, L.J.; Yang, G.L.; Cheng, F.L.; Zhou, Y.F.; Xiong, B.; Yonemura, Y.; Li, Y. Cytoreductive surgery and hyperthermic intraperitoneal chemotherapy improves survival of patients with peritoneal carcinomatosis from gastric cancer: final results of a phase III randomized clinical trial. *Ann Surg Oncol* **2011**, *18*, 1575–1581, doi:10.1245/s10434-011-1631-5.
113. Evers, D.J.; Smeenk, R.M.; Bottenberg, P.D.; van Werkhoven, E.D.; Boot, H.; Verwaal, V.J. Effect of preservation of the right gastro-epiploic artery on delayed gastric emptying after cytoreductive surgery and HIPEC: a randomized clinical trial. *Eur J Surg Oncol* **2011**, *37*, 162–167, doi:10.1016/j.ejso.2010.12.005.
114. Yang, X.J.; Li, Y.; Yonemura, Y. Cytoreductive surgery plus hyperthermic intraperitoneal chemotherapy to treat gastric cancer with ascites and/or peritoneal carcinomatosis: Results from a Chinese center. *J Surg Oncol* **2010**, *101*, 457–464, doi:10.1002/jso.21519.
115. Li, C.; Yan, M.; Chen, J.; Xiang, M.; Zhu, Z.G.; Yin, H.R.; Lin, Y.Z. Surgical resection with hyperthermic intraperitoneal chemotherapy for gastric cancer patients with peritoneal dissemination. *J Surg Oncol* **2010**, *102*, 361–365, doi:10.1002/jso.21628.
116. Piso, P.; Slowik, P.; Popp, F.; Dahlke, M.H.; Glockzin, G.; Schlitt, H.J. Safety of gastric resections during cytoreductive surgery and hyperthermic intraperitoneal chemotherapy for peritoneal carcinomatosis. *Ann Surg Oncol* **2009**, *16*, 2188–2194, doi:10.1245/s10434-009-0478-5.
117. Zhu, Z.G.; Tang, R.; Yan, M.; Chen, J.; Yang, Q.M.; Li, C.; Yao, X.X.; Zhang, J.; Yin, H.R.; Lin, Y.Z. Efficacy and safety of intraoperative peritoneal hyperthermic chemotherapy for advanced gastric cancer patients with serosal invasion. A long-term follow-up study. *Dig Surg* **2006**, *23*, 93–102, doi:10.1159/000093778.

118. Hall, J.J.; Loggie, B.W.; Shen, P.; Beamer, S.; Douglas Case, L.; McQuellon, R.; Geisinger, K.R.; Levine, E.A. Cytoreductive surgery with intraperitoneal hyperthermic chemotherapy for advanced gastric cancer. *J Gastrointest Surg* **2004**, *8*, 454–463, doi:10.1016/j.gassur.2003.12.014.
119. Glehen, O.; Schreiber, V.; Cotte, E.; Sayag-Beaujard, A.C.; Osinsky, D.; Freyer, G.; Francois, Y.; Vignal, J.; Gilly, F.N. Cytoreductive surgery and intraperitoneal chemohyperthermia for peritoneal carcinomatosis arising from gastric cancer. *Arch Surg* **2004**, *139*, 20–26, doi:10.1001/archsurg.139.1.20.
120. Kunisaki, C.; Shimada, H.; Nomura, M.; Akiyama, H.; Takahashi, M.; Matsuda, G. Lack of efficacy of prophylactic continuous hyperthermic peritoneal perfusion on subsequent peritoneal recurrence and survival in patients with advanced gastric cancer. *Surgery* **2002**, *131*, 521–528.
121. Kern, W.; Braess, J.; Kotschovsky, M.; Samel, S.; Becker, H.; Hiddemann, W.; Schleyer, E. Application of cisplatin as intraoperative hyperthermic peritoneal lavage (IHPL) in patients with locally advanced gastric cancer: analysis of pharmacokinetics and of nephrotoxicity. *Anticancer Res* **2002**, *22*, 3099–3102.
122. Kim, J.Y.; Bae, H.S. A controlled clinical study of serosa-invasive gastric carcinoma patients who underwent surgery plus intraperitoneal hyperthermo-chemo-perfusion (IHCP). *Gastric Cancer* **2001**, *4*, 27–33, doi:10.1007/s101200100013.
123. Stephens, A.D.; Alderman, R.; Chang, D.; Edwards, G.D.; Esquivel, J.; Sebbag, G.; Steves, M.A.; Sugarbaker, P.H. Morbidity and mortality analysis of 200 treatments with cytoreductive surgery and hyperthermic intraoperative intraperitoneal chemotherapy using the coliseum technique. *Ann Surg Oncol* **1999**, *6*, 790–796.
124. Sayag-Beaujard, A.C.; Francois, Y.; Glehen, O.; Sadeghi-Looyeh, B.; Bienvenu, J.; Panteix, G.; Garbit, F.; Grandclement, E.; Vignal, J.; Gilly, F.N. Intraperitoneal chemo-hyperthermia with mitomycin C for gastric cancer patients with peritoneal carcinomatosis. *Anticancer Res* **1999**, *19*, 1375–1382.
125. Fujimoto, S.; Takahashi, M.; Mutou, T.; Kobayashi, K.; Toyosawa, T. Successful intraperitoneal hyperthermic chemoperfusion for the prevention of postoperative peritoneal recurrence in patients with advanced gastric carcinoma. *Cancer* **1999**, *85*, 529–534.
126. Hamazoe, R.; Maeta, M.; Kaibara, N. Intraperitoneal thermochemotherapy for prevention of peritoneal recurrence of gastric cancer. Final results of a randomized controlled study. *Cancer* **1994**, *73*, 2048–2052.
127. Fujimoto, S.; Shrestha, R.D.; Kokubun, M.; Kobayashi, K.; Kiuchi, S.; Konno, C.; Ohta, M.; Takahashi, M.; Kitsukawa, Y.; Mizutani, M., et al. Positive results of combined therapy of surgery and intraperitoneal hyperthermic perfusion for far-advanced gastric cancer. *Ann Surg* **1990**, *212*, 592–596.
128. Koga, S.; Hamazoe, R.; Maeta, M.; Shimizu, N.; Murakami, A.; Wakatsuki, T. Prophylactic therapy for peritoneal recurrence of gastric cancer by continuous hyperthermic peritoneal perfusion with mitomycin C. *Cancer* **1988**, *61*, 232–237.
129. Li, Y.C.; Khashab, T.; Terhune, J.; Eckert, R.L.; Hanna, N.; Burke, A.; Richard Alexander, H. Preoperative Thrombocytosis Predicts Shortened Survival in Patients with Malignant Peritoneal Mesothelioma Undergoing Operative Cytoreduction and Hyperthermic Intraperitoneal Chemotherapy. *Ann Surg Oncol* **2017**, *24*, 2259–2265, doi:10.1245/s10434-017-5834-2.
130. Kepenekian, V.; Elias, D.; Passot, G.; Mery, E.; Goere, D.; Delroeux, D.; Quenet, F.; Ferron, G.; Pezet, D.; Guilloit, J.M., et al. Diffuse malignant peritoneal mesothelioma: Evaluation of systemic chemotherapy with comprehensive treatment through the RENAPE Database: Multi-Institutional Retrospective Study. *Eur J Cancer* **2016**, *65*, 69–79, doi:10.1016/j.ejca.2016.06.002.
131. Huang, Y.; Alzahrani, N.A.; Liauw, W.; Morris, D.L. Repeat cytoreductive surgery and hyperthermic intraperitoneal chemotherapy for recurrent diffuse malignant peritoneal mesothelioma. *Eur J Surg Oncol* **2015**, *41*, 1373–1378, doi:10.1016/j.ejso.2015.07.004.
132. Robella, M.; Vaira, M.; Mellano, A.; Marsanic, P.; Cinquegrana, A.; Borsano, A.; Barbera, M.; Caneparo, A.; Siatis, D.; Sottile, A., et al. Treatment of diffuse malignant peritoneal mesothelioma (DMPM) by cytoreductive surgery and HIPEC. *Minerva Chir* **2014**, *69*, 9–15.
133. Passot, G.; Bakrin, N.; Isaac, S.; Decullier, E.; Gilly, F.N.; Glehen, O.; Cotte, E. Postoperative outcomes of laparoscopic vs open cytoreductive surgery plus hyperthermic intraperitoneal chemotherapy for treatment of peritoneal surface malignancies. *Eur J Surg Oncol* **2014**, *40*, 957–962, doi:10.1016/j.ejso.2013.10.002.
134. Hommell-Fontaine, J.; Isaac, S.; Passot, G.; Decullier, E.; Traverse-Glehen, A.; Cotte, E.; You, B.; Mohamed, F.; Gilly, F.N.; Glehen, O., et al. Malignant peritoneal mesothelioma treated by cytoreductive surgery and

- hyperthermic intraperitoneal chemotherapy: is GLUT1 expression a major prognostic factor? A preliminary study. *Ann Surg Oncol* **2013**, *20*, 3892–3898, doi:10.1245/s10434-013-3077-4.
135. Deraco, M.; Baratti, D.; Hutanu, I.; Bertuli, R.; Kusamura, S. The role of perioperative systemic chemotherapy in diffuse malignant peritoneal mesothelioma patients treated with cytoreductive surgery and hyperthermic intraperitoneal chemotherapy. *Ann Surg Oncol* **2013**, *20*, 1093–1100, doi:10.1245/s10434-012-2845-x.
136. Chua, T.C.; Liauw, W.; Saxena, A.; Al-Mohaimeed, K.; Fransi, S.; Zhao, J.; Morris, D.L. Evolution of locoregional treatment for peritoneal carcinomatosis: single-center experience of 308 procedures of cytoreductive surgery and perioperative intraperitoneal chemotherapy. *Am J Surg* **2011**, *201*, 149–156, doi:10.1016/j.amjsurg.2010.02.012.
137. Blackham, A.U.; Shen, P.; Stewart, J.H.; Russell, G.B.; Levine, E.A. Cytoreductive surgery with intraperitoneal hyperthermic chemotherapy for malignant peritoneal mesothelioma: mitomycin versus cisplatin. *Ann Surg Oncol* **2010**, *17*, 2720–2727, doi:10.1245/s10434-010-1080-6.
138. Baratti, D.; Kusamura, S.; Nonaka, D.; Oliva, G.D.; Laterza, B.; Deraco, M. Multicystic and well-differentiated papillary peritoneal mesothelioma treated by surgical cytoreduction and hyperthermic intra-peritoneal chemotherapy (HIPEC). *Ann Surg Oncol* **2007**, *14*, 2790–2797, doi:10.1245/s10434-007-9475-8.
139. Baratti, D.; Kusamura, S.; Cabras, A.D.; Dileo, P.; Laterza, B.; Deraco, M. Diffuse malignant peritoneal mesothelioma: Failure analysis following cytoreduction and hyperthermic intraperitoneal chemotherapy (HIPEC). *Ann Surg Oncol* **2009**, *16*, 463–472, doi:10.1245/s10434-008-0219-1.
140. Elias, D.; Bedard, V.; Bouzid, T.; Duvillard, P.; Kohneh-Sharhi, N.; Raynard, B.; Goere, D. Malignant peritoneal mesothelioma: treatment with maximal cytoreductive surgery plus intraperitoneal chemotherapy. *Gastroenterol Clin Biol* **2007**, *31*, 784–788.
141. Deraco, M.; Nonaka, D.; Baratti, D.; Casali, P.; Rosai, J.; Younan, R.; Salvatore, A.; Cabras Ad, A.D.; Kusamura, S. Prognostic analysis of clinicopathologic factors in 49 patients with diffuse malignant peritoneal mesothelioma treated with cytoreductive surgery and intraperitoneal hyperthermic perfusion. *Ann Surg Oncol* **2006**, *13*, 229–237, doi:10.1245/ASO.2006.03.045.
142. Deraco, M.; Casali, P.; Inglese, M.G.; Baratti, D.; Pennacchioli, E.; Bertulli, R.; Kusamura, S. Peritoneal mesothelioma treated by induction chemotherapy, cytoreductive surgery, and intraperitoneal hyperthermic perfusion. *J Surg Oncol* **2003**, *83*, 147–153, doi:10.1002/jso.10255.
143. Kozman, M.A.; Fisher, O.M.; Rebolledo, B.J.; Valle, S.J.; Alzahrani, N.; Liauw, W.; Morris, D.L. CA 19-9 to peritoneal carcinomatosis index (PCI) ratio is prognostic in patients with epithelial appendiceal mucinous neoplasms and peritoneal dissemination undergoing cytoreduction surgery and intraperitoneal chemotherapy: A retrospective cohort study. *Eur J Surg Oncol* **2017**, *43*, 2299–2307, doi:10.1016/j.ejso.2017.09.009.
144. Baratti, D.; Kusamura, S.; Milione, M.; Pietrantonio, F.; Caporale, M.; Guaglio, M.; Deraco, M. Pseudomyxoma Peritonei of Extra-Appendiceal Origin: A Comparative Study. *Ann Surg Oncol* **2016**, *23*, 4222–4230, doi:10.1245/s10434-016-5350-9.
145. Sparks, D.S.; Morris, B.; Xu, W.; Fulton, J.; Atkinson, V.; Meade, B.; Lutton, N. Cytoreductive surgery and heated intraperitoneal chemotherapy for peritoneal carcinomatosis secondary to mucinous adenocarcinoma of the appendix. *Int Surg* **2015**, *100*, 21–28, doi:10.9738/INTSURG-D-14-00089.1.
146. Kusamura, S.; Baratti, D.; Hutanu, I.; Gavazzi, C.; Morelli, D.; Iusco, D.R.; Grassi, A.; Bonomi, S.; Virzi, S.; Haeusler, E., et al. The role of baseline inflammatory-based scores and serum tumor markers to risk stratify pseudomyxoma peritonei patients treated with cytoreduction (CRS) and hyperthermic intraperitoneal chemotherapy (HIPEC). *Eur J Surg Oncol* **2015**, *41*, 1097–1105, doi:10.1016/j.ejso.2015.04.005.
147. Taflampas, P.; Dayal, S.; Chandrakumaran, K.; Mohamed, F.; Cecil, T.D.; Moran, B.J. Pre-operative tumour marker status predicts recurrence and survival after complete cytoreduction and hyperthermic intraperitoneal chemotherapy for appendiceal Pseudomyxoma Peritonei: Analysis of 519 patients. *Eur J Surg Oncol* **2014**, *40*, 515–520, doi:10.1016/j.ejso.2013.12.021.
148. Arjona-Sanchez, A.; Munoz-Casares, F.C.; Casado-Adam, A.; Sanchez-Hidalgo, J.M.; Ayllon Teran, M.D.; Orti-Rodriguez, R.; Padial-Aguado, A.C.; Medina-Fernandez, J.; Ortega-Salas, R.; Pulido-Cortijo, G., et al. Outcome of patients with aggressive pseudomyxoma peritonei treated by cytoreductive surgery and intraperitoneal chemotherapy. *World J Surg* **2013**, *37*, 1263–1270, doi:10.1007/s00268-013-2000-2.

149. Elias, D.; Honore, C.; Ciuchendea, R.; Billard, V.; Raynard, B.; Lo Dico, R.; Dromain, C.; Duvillard, P.; Goere, D. Peritoneal pseudomyxoma: results of a systematic policy of complete cytoreductive surgery and hyperthermic intraperitoneal chemotherapy. *Br J Surg* **2008**, *95*, 1164–1171, doi:10.1002/bjs.6235.
150. Baratti, D.; Kusamura, S.; Martinetti, A.; Seregini, E.; Laterza, B.; Oliva, D.G.; Deraco, M. Prognostic value of circulating tumor markers in patients with pseudomyxoma peritonei treated with cytoreductive surgery and hyperthermic intraperitoneal chemotherapy. *Ann Surg Oncol* **2007**, *14*, 2300–2308, doi:10.1245/s10434-007-9393-9.
151. Loungnarath, R.; Causeret, S.; Bossard, N.; Faheez, M.; Sayag-Beaujard, A.C.; Brigand, C.; Gilly, F.; Glehen, O. Cytoreductive surgery with intraperitoneal chemohyperthermia for the treatment of pseudomyxoma peritonei: a prospective study. *Dis Colon Rectum* **2005**, *48*, 1372–1379, doi:10.1007/s10350-005-0045-5.
152. Deraco, M.; Baratti, D.; Inglese, M.G.; Allaria, B.; Andreola, S.; Gavazzi, C.; Kusamura, S. Peritonectomy and intraperitoneal hyperthermic perfusion (IPHP): a strategy that has confirmed its efficacy in patients with pseudomyxoma peritonei. *Ann Surg Oncol* **2004**, *11*, 393–398, doi:10.1245/ASO.2004.07.002.
153. Deraco, M.; De Simone, M.; Rossi, C.R.; Cavaliere, F.; Di Filippo, F.; Vaira, M.; Piatti, P.; Kusamura, S. An Italian Multicentric Phase II study on peritonectomy and intra peritoneal hyperthermic perfusion (IPHP) to treat patients with pseudomyxoma peritonei. *J Exp Clin Cancer Res* **2003**, *22*, 35–39.
154. Deraco, M.; Gronchi, A.; Mazzaferro, V.; Inglese, M.G.; Pennacchioli, E.; Kusamura, S.; Rizzi, M.; Anselmi, R.A., Jr.; Vaglini, M. Feasibility of peritonectomy associated with intraperitoneal hyperthermic perfusion in patients with Pseudomyxoma peritonei. *Tumori* **2002**, *88*, 370–375.
155. Chen, M.Y.; Chiles, C.; Loggie, B.W.; Choplin, R.H.; Perini, M.A.; Fleming, R.A. Thoracic complications in patients undergoing intraperitoneal heated chemotherapy with mitomycin following cytoreductive surgery. *J Surg Oncol* **1997**, *66*, 19–23.

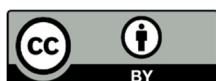

© 2019 by the authors. Submitted for possible open access publication under the terms and conditions of the Creative Commons Attribution (CC BY) license (<http://creativecommons.org/licenses/by/4.0/>).
